# Supplementary material for: A NCS mediated oxidative C–H bond functionalization: direct esterification between a C(sp3)–H bond and carboxylic acids
Source: Royal Society of Chemistry journal article supplement (doi:10.1039/c5cc02424b), 2015-01-01

## SUPPORTING INFORMATION

### A NCS mediated oxidative C-H bond functionalization: direct esterification between C(sp<sup>3</sup>)-H bond and carboxylic acids

Yang Zheng,<sup>a</sup> Jincheng Mao,<sup>\*ab</sup> Guangwei Rong<sup>a</sup> and Xinfang Xu<sup>\*a</sup>

*Key Laboratory of Organic Synthesis of Jiangsu Province, College of Chemistry,  
Chemical Engineering and Materials Science, Soochow University, Suzhou 215123, P.  
R. China, E-mail: [xinfangxu@suda.edu.cn](mailto:xinfangxu@suda.edu.cn)*

*State Key Laboratory of Oil and Gas Reservoir Geology and Exploitation, Southwest  
Petroleum University, Chengdu, 610500, P. R. China, E-mail: [jcmiao@suda.edu.cn](mailto:jcmiao@suda.edu.cn)*

#### Table of Contents

|                                                          |                |
|----------------------------------------------------------|----------------|
| <b>1. General information</b>                            | <b>S2</b>      |
| <b>2. Characterization of the Corresponding Products</b> | <b>S3 –S12</b> |
| <b>3. NMR Spectra</b>                                    | <b>S13–S43</b> |
| <b>4. HRMS and Proton NMR Observation of A and D</b>     | <b>S44</b>     |

**General experimental:** All reactions were carried out in air. Carboxylic acids, *N*-Chlorosuccinimide (NCS), base, and the solvent used in this reaction were obtained from commercial sources and used without further purification. Flash column chromatography was performed using silica gel (300-400 mesh). Analytical thin-layer chromatography was performed using glass plates pre-coated with 200-300 mesh silica gel impregnated with a fluorescent indicator (254 nm). NMR spectra were recorded in CDCl<sub>3</sub> on a Varian Inova-400 NMR spectrometer (400 MHz); chemical shifts were reported in ppm with the solvent signals as reference, and coupling constants (J) were given in Hertz. The peak information was described as: br = broad, s = singlet, d = doublet, t = triplet, q = quartet, m = multiplet, comp = composite. Products were characterized by comparison of <sup>1</sup>H NMR, <sup>13</sup>C NMR and TOF-MS data in the literatures.

#### **General Procedure for the NCS-Promoted Oxidative Coupling Esterfication.**

To a Schlenk tube equipped with a magnetic stir bar was added carboxylic acids (**1**, 0.30 mmol), NCS (*N*-Chlorosuccinimide, 68.1 mg, 0.51 mmol), base (0.51 mmol), and ether **2** (2.0 mL). The reaction mixture was stirred at 80 °C for 12 hours. At the end of the reaction, the reaction mixture was cooled to room temperature. After removal of the solvent, the residue was purified by column chromatography on silica gel (eluent: hexanes:EtOAc = 6:1) to afford the pure products.

---

## Characterization of the Corresponding Products:

### 1,4-Dioxan-2-yl 3-phenylpropiolate

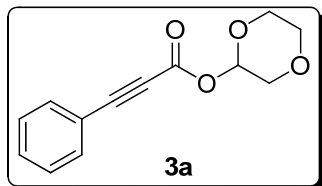

White oil; 53.8 mg; 77% yield;  $^1\text{H}$  NMR (400 MHz,  $\text{CDCl}_3$ ) ( $\delta$ , ppm) 7.61 (dd,  $J = 8.3$  Hz, 1.3 Hz, 2H), 7.47 (ddd,  $J = 6.6$  Hz, 3.9 Hz, 1.3 Hz, 1H), 7.41-7.37 (m, 2H), 5.99 (s, 1H), 4.26-4.20 (m, 2H), 3.85-3.80 (comp, 4H), 3.67 (dt,  $J = 11.7$  Hz, 2.3 Hz, 1H);  $^{13}\text{C}$  NMR (100 MHz,  $\text{CDCl}_3$ ) ( $\delta$ , ppm) 152.8, 133.1, 130.9, 128.6, 119.4, 90.7, 87.5, 80.3, 67.5, 66.0, 61.6; HRMS (TOF MS  $\text{Cl}^+$ ) calculated for  $\text{C}_{13}\text{H}_{13}\text{O}_4$   $[\text{M}+\text{H}]^+$ : 233.0814, found 233.0817.

### 1,4-Dioxan-2-yl 3-(4-methoxyphenyl)propiolate

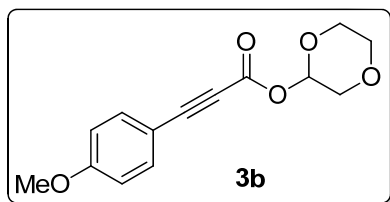

White oil; 56.0 mg; 71% yield;  $^1\text{H}$  NMR (400 MHz,  $\text{CDCl}_3$ ) ( $\delta$ , ppm) 7.57 (d,  $J = 8.8$  Hz, 2H), 6.90 (d,  $J = 8.8$  Hz, 2H), 5.98 (s, 1H), 4.26-4.20 (m, 1H), 3.87-3.80 (comp, 7H), 3.69-3.65 (m, 1H);  $^{13}\text{C}$  NMR (100 MHz,  $\text{CDCl}_3$ ) ( $\delta$ , ppm) 161.7, 153.0, 135.1, 114.3, 111.1, 90.5, 88.5, 79.8, 67.5, 66.0, 61.6, 55.4; HRMS (TOF MS  $\text{Cl}^+$ ) calculated for  $\text{C}_{14}\text{H}_{15}\text{O}_5$   $[\text{M}+\text{H}]^+$ : 263.0919, found 263.0928.

### 1,4-Dioxan-2-yl 3-*p*-tolylpropiolate

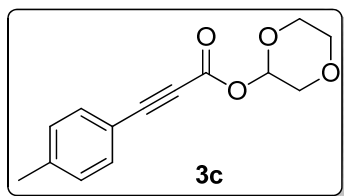

White oil; 54.0 mg; 73% yield;  $^1\text{H}$  NMR (400 MHz,  $\text{CDCl}_3$ ) ( $\delta$ , ppm) 7.52 (d,  $J = 8.0$  Hz, 2H), 7.20 (d,  $J = 8.0$  Hz, 2H), 5.99 (s, 1H), 4.27-4.21 (m, 1H), 3.85-3.81 (comp, 4H), 3.67 (dt,  $J = 11.7$  Hz, 2.2 Hz, 1H), 2.40 (s, 2H).  $^{13}\text{C}$  NMR (100 MHz,  $\text{CDCl}_3$ ) ( $\delta$ , ppm) 152.9, 141.6, 133.2, 129.4, 116.3, 90.6, 88.1, 80.0, 67.5, 66.0, 61.6, 21.7; HRMS (TOF MS  $\text{Cl}^+$ ) calculated for  $\text{C}_{14}\text{H}_{15}\text{O}_4$   $[\text{M}+\text{H}]^+$ : 247.0970, found 247.0960.

### 1,4-Dioxan-2-yl 3-(4-*tert*-butylphenyl)propiolate

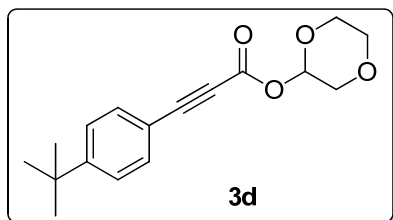

White oil; 72.0 mg; 83% yield;  $^1\text{H}$  NMR (400 MHz,  $\text{CDCl}_3$ ) ( $\delta$ , ppm) 7.58-7.55 (m, 2H), 7.43-7.41 (m, 2H), 6.00 (s, 1H), 4.28-4.22 (m, 1H), 3.86-3.82 (comp, 4H), 3.68 (dt,  $J = 11.7$  Hz, 2.4 Hz, 1H), 1.34 (s, 9H).  $^{13}\text{C}$  NMR (100 MHz,  $\text{CDCl}_3$ ) ( $\delta$ , ppm) 154.6, 153.0, 133.1, 125.7, 116.3, 90.6, 88.1, 80.0, 67.5, 66.1, 61.6, 35.1, 31.0; HRMS (TOF MS  $\text{Cl}^+$ ) calculated for  $\text{C}_{17}\text{H}_{21}\text{O}_4$   $[\text{M}+\text{H}]^+$ : 289.1440, found 289.1441.

### 1,4-Dioxan-2-yl 3-(4-fluorophenyl)propiolate

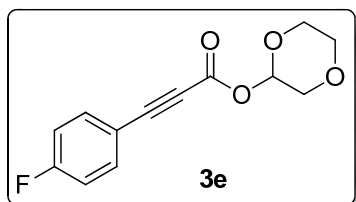

White oil; 48.9 mg; 65% yield;  $^1\text{H}$  NMR (400 MHz,  $\text{CDCl}_3$ ) ( $\delta$ , ppm) 7.65-7.61 (comp, 2H), 7.10 (t,  $J=8.6$ , 2H), 6.00 (s, 1H), 4.27-4.20 (m, 1H), 3.86-3.82 (comp, 4H), 3.68 (dt,  $J = 11.8$  Hz, 2.3 Hz, 1H);  $^{13}\text{C}$  NMR (100 MHz,  $\text{CDCl}_3$ ) ( $\delta$ , ppm) 164.0 (d,  $J = 250.0$  Hz), 152.7, 135.5 (d,  $J = 9.0$  Hz), 116.2 (d,  $J = 23.0$  Hz), 115.5, 90.7, 86.4, 80.2, 67.5, 66.0, 61.6; HRMS (TOF MS  $\text{Cl}^+$ ) calculated for  $\text{C}_{13}\text{H}_{12}\text{FO}_4$   $[\text{M}+\text{H}]^+$ : 251.0720, found 251.0728.

### 1,4-Dioxan-2-yl 3-(4-bromophenyl)propiolate

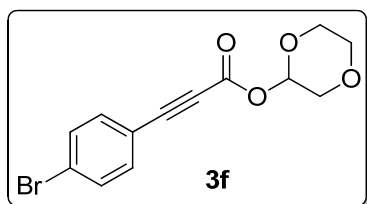

White oil; 60.6 mg; 65% yield;  $^1\text{H}$  NMR (400 MHz,  $\text{CDCl}_3$ ) ( $\delta$ , ppm) 7.55 (d,  $J = 8.5$  Hz, 2H), 7.48 (d,  $J = 8.5$  Hz, 2H), 6.00 (s, 1H), 4.27-4.20 (m, 1H), 3.86-3.82 (comp, 4H), 3.68 (dt,  $J = 11.7$  Hz, 2.1 Hz, 1H);  $^{13}\text{C}$  NMR (100 MHz,  $\text{CDCl}_3$ ) ( $\delta$ , ppm) 152.6, 134.4, 132.1, 125.7, 118.3, 90.8, 86.2, 81.2, 67.4, 66.0, 61.6; HRMS (TOF MS  $\text{Cl}^+$ ) calculated for  $\text{C}_{13}\text{H}_{12}\text{BrO}_4$   $[\text{M}+\text{H}]^+$ : 310.9919, found 310.9921.

### 1,4-Dioxan-2-yl 3-(4-chlorophenyl)propiolate

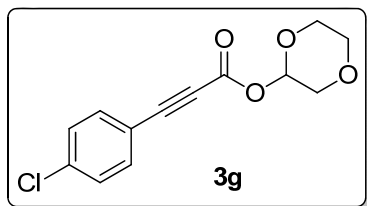

White oil; 49.7 mg; 62% yield;  $^1\text{H}$  NMR (400 MHz,  $\text{CDCl}_3$ ) ( $\delta$ , ppm) 7.57-7.54 (m, 2H), 7.40-7.37 (m, 2H), 6.00 (s, 1H), 4.27-4.20 (m, 1H), 3.86-3.82 (comp, 4H), 3.68 (dt,  $J = 11.8$  Hz, 2.3 Hz, 1H);  $^{13}\text{C}$  NMR (100 MHz,  $\text{CDCl}_3$ ) ( $\delta$ , ppm) 152.6, 137.3, 134.3, 129.1, 117.9, 90.8, 86.1, 81.1, 67.4, 66.0, 61.6; HRMS (TOF MS  $\text{Cl}^+$ ) calculated for  $\text{C}_{13}\text{H}_{12}\text{ClO}_4$   $[\text{M}+\text{H}]^+$ : 267.0424, found 267.0429.

### 1,4-Dioxan-2-yl 3-(3-chlorophenyl)propiolate

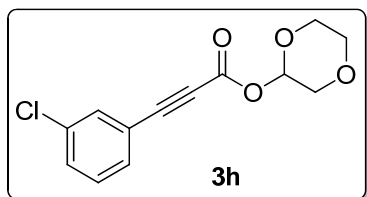

White oil; 51.3 mg; 64% yield;  $^1\text{H}$  NMR (400 MHz,  $\text{CDCl}_3$ ) ( $\delta$ , ppm) 7.61 (t,  $J = 1.7$  Hz, 1H), 7.51 (dt,  $J = 7.6$  Hz, 1.3 Hz, 1H), 7.47-7.44 (m, 1H), 7.34 (t,  $J = 7.9$  Hz, 1H), 6.00 (s, 1H), 4.27-4.20 (m, 1H), 3.86-3.82 (comp, 4H), 3.68 (dt,  $J = 11.8$  Hz, 2.3 Hz, 1H);  $^{13}\text{C}$  NMR (100 MHz,  $\text{CDCl}_3$ ) ( $\delta$ , ppm) 152.5, 134.6, 132.8, 131.2, 129.9, 121.1, 90.9, 85.5, 81.0, 67.4, 66.0, 61.6; HRMS (TOF MS  $\text{Cl}^+$ ) calculated for  $\text{C}_{13}\text{H}_{12}\text{ClO}_4$   $[\text{M}+\text{H}]^+$ : 267.0424, found 267.0425.

### 1,4-Dioxan-2-yl 3-(2-chlorophenyl)propiolate

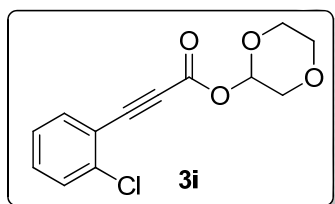

White oil; 61.7 mg; 77% yield;  $^1\text{H}$  NMR (400 MHz,  $\text{CDCl}_3$ ) ( $\delta$ , ppm) 7.64-7.62 (m, 1H), 7.47-7.45 (m, 1H), 7.43-7.38 (m, 1H), 7.32-7.28 (m, 1H), 6.01 (s, 1H), 4.27-4.21 (m, 1H), 3.87-3.81 (comp, 4H), 3.68 (dt,  $J = 11.9$  Hz, 2.4 Hz, 1H);  $^{13}\text{C}$  NMR (100 MHz,  $\text{CDCl}_3$ ) ( $\delta$ , ppm) 152.5, 137.5, 134.8, 131.8, 129.7, 126.7, 119.8, 90.9, 84.4, 83.7, 67.4, 66.0, 61.7; HRMS (TOF MS  $\text{Cl}^+$ ) calculated for  $\text{C}_{13}\text{H}_{12}\text{ClO}_4$   $[\text{M}+\text{H}]^+$ : 267.0424, found 267.0414.

### 1,4-Dioxan-2-yl 3-(2-bromophenyl)propiolate

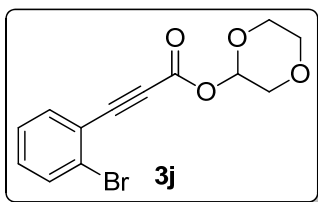

White oil; 66.1 mg; 71% yield;  $^1\text{H}$  NMR (400 MHz,  $\text{CDCl}_3$ ) ( $\delta$ , ppm) 7.65-7.61 (m, 2H), 7.37-7.30 (m, 2H), 6.01 (s, 1H), 4.27-4.20 (m, 1H), 3.90-3.78 (comp, 4H), 3.68 (dt,  $J = 11.8$  Hz, 2.4, 1H);  $^{13}\text{C}$  NMR (100 MHz,  $\text{CDCl}_3$ ) ( $\delta$ , ppm) 152.5, 134.9, 132.8, 131.9, 127.3, 126.6, 122.0, 90.9, 85.2, 83.8, 67.4, 66.0, 61.7; HRMS (TOF MS  $\text{Cl}^+$ ) calculated for  $\text{C}_{13}\text{H}_{12}\text{BrO}_4$   $[\text{M}+\text{H}]^+$ : 310.9919, found 310.9929.

### 1,4-Dioxan-2-yl 3-*o*-tolylpropiolate

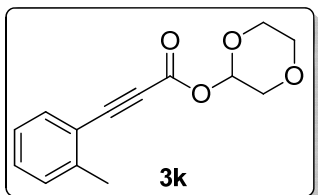

White oil; 51.9 mg; 70% yield;  $^1\text{H}$  NMR (400 MHz,  $\text{CDCl}_3$ ) ( $\delta$ , ppm) 7.58 (d,  $J = 7.1$  Hz, 1H), 7.37 (td,  $J = 7.6$  Hz, 1.1 Hz, 1H), 7.24 (dt,  $J = 15.1$  Hz, 5.4 Hz, 2H), 6.01 (s, 1H), 4.28-4.21 (m, 1H), 3.82-3.87 (comp, 4H), 3.69 (dt,  $J = 11.8$  Hz, 2.4 Hz, 1H), 2.52 (s, 3H);  $^{13}\text{C}$  NMR (100 MHz,  $\text{CDCl}_3$ ) ( $\delta$ , ppm) 152.4, 142.0, 133.0, 130.4, 129.3, 125.3, 118.7, 90.2, 86.2, 83.5, 67.0, 65.5, 61.2, 20.1; HRMS (TOF MS  $\text{Cl}^+$ ) calculated for  $\text{C}_{14}\text{H}_{15}\text{O}_4$   $[\text{M}+\text{H}]^+$ : 247.0970, found 247.0974.

### 1,4-Dioxan-2-yl 3-(naphthalen-1-yl)propiolate

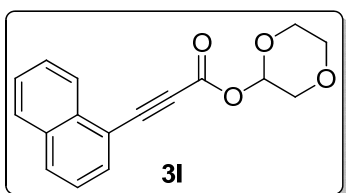

White oil; 53.5 mg; 63% yield;  $^1\text{H}$  NMR (400 MHz,  $\text{CDCl}_3$ ) ( $\delta$ , ppm) 8.38 (d,  $J = 8.4$  Hz, 1H), 7.98 (d,  $J = 8.4$  Hz, 1H), 7.93-7.87 (comp, 2H), 7.68-7.64 (m, 1H), 7.61-7.57 (m, 1H), 7.51-7.47 (m, 1H), 6.07 (s, 1H), 4.33-4.27 (m, 1H), 3.96-3.82 (comp, 4H), 3.72 (dt,  $J = 11.7$  Hz, 2.3 Hz, 1H);  $^{13}\text{C}$  NMR (100 MHz,  $\text{CDCl}_3$ ) ( $\delta$ , ppm) 152.4, 133.2, 132.9, 132.5, 131.1, 128.0, 127.3, 126.5, 125.3, 124.6, 116.5, 90.3, 85.5, 84.4, 67.0, 65.6, 61.2; HRMS (TOF MS  $\text{Cl}^+$ ) calculated for  $\text{C}_{17}\text{H}_{14}\text{O}_4$   $[\text{M}+\text{H}]^+$ : 283.0970, found 283.0965.

### 1,4-Dioxan-2-yl 3-(naphthalen-2-yl)propiolate

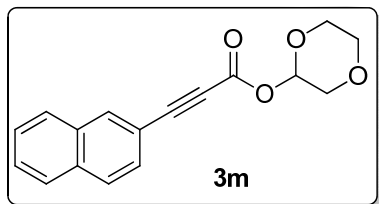

White oil; 46.7 mg; 55% yield;  $^1\text{H}$  NMR (400 MHz,  $\text{CDCl}_3$ ) ( $\delta$ , ppm) 8.24 (s, 1H), 7.90-7.87 (comp, 3H), 7.66-7.57 (comp, 3H), 6.07 (s, 1H), 4.35-4.28 (m, 1H), 3.96-3.84 (comp, 4H), 3.74 (dt,  $J = 11.7$  Hz, 2.3 Hz, 1H);  $^{13}\text{C}$  NMR (100 MHz,  $\text{CDCl}_3$ ) ( $\delta$ , ppm) 152.4, 134.1, 133.5, 132.1, 128.0, 127.8, 127.7, 127.6, 127.4, 126.6, 116.1, 90.2, 87.6, 80.0, 67.0, 65.6, 61.1; HRMS (TOF MS  $\text{Cl}^+$ ) calculated for  $\text{C}_{17}\text{H}_{15}\text{O}_4$   $[\text{M}+\text{H}]^+$ : 283.0970, found 283.0967.

### 1,4-Dioxan-2-yl but-2-ynoate

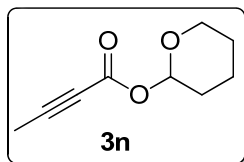

White oil; 31.8 mg; 62% yield;  $^1\text{H}$  NMR (400 MHz,  $\text{CDCl}_3$ ) ( $\delta$ , ppm) 5.90 (s, 1H), 4.20-4.14 (m, 1H), 3.80-3.78 (comp, 4H), 3.64 (dt,  $J = 11.9$  Hz, 2.4 Hz, 1H), 2.02 (s, 3H);  $^{13}\text{C}$  NMR (100 MHz,  $\text{CDCl}_3$ ) ( $\delta$ , ppm) 151.9, 89.9, 86.6, 71.6, 66.9, 65.5, 61.1, 3.4; HRMS (TOF MS  $\text{Cl}^+$ ) calculated for  $\text{C}_8\text{H}_{10}\text{O}_4$   $[\text{M}+\text{H}]^+$ : 171.0657, found 171.0660.

### 1,4-Dioxan-2-yl benzoate

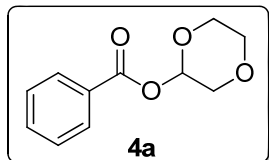

White oil; 46.4 mg; 74% yield;  $^1\text{H}$  NMR (400 MHz,  $\text{CDCl}_3$ ) ( $\delta$ , ppm) 8.19-8.17 (m, 2H), 7.66-7.62 (m, 1H), 7.53-7.49 (m, 2H), 6.15 (t,  $J = 1.9$  Hz, 1H), 4.31-4.25 (m, 1H), 3.95 (d,  $J = 2.0$  Hz, 2H), 3.88 (dd,  $J = 6.8$  Hz, 2.6 Hz, 2H), 3.73 (dt,  $J = 11.8$  Hz, 2.6 Hz, 1H);  $^{13}\text{C}$  NMR (100 MHz,  $\text{CDCl}_3$ ) ( $\delta$ , ppm) 164.8, 132.9, 129.4, 129.2, 128.0, 89.3, 67.4, 65.7, 61.3; HRMS (TOF MS  $\text{Cl}^+$ ) calculated for  $\text{C}_{11}\text{H}_{13}\text{O}_4$   $[\text{M}+\text{H}]^+$ : 209.0814, found 209.0810.

### 1,4-Dioxan-2-yl 4-*tert*-butylbenzoate

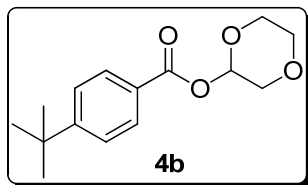

White oil; 74.7 mg; 94% yield;  $^1\text{H}$  NMR (400 MHz,  $\text{CDCl}_3$ ) ( $\delta$ , ppm) 8.12-8.09 (m, 2H), 7.54-7.51 (m, 2H), 6.14 (t,  $J = 1.8$  Hz, 1H), 4.30-4.23 (m, 1H), 3.94-3.93 (m, 2H), 3.87 (dd,  $J = 6.7$  Hz, 2.6 Hz, 2H), 3.72 (dt,  $J = 11.7$  Hz, 2.6 Hz, 1H), 1.39 (s, 9H);  $^{13}\text{C}$  NMR (100 MHz,  $\text{CDCl}_3$ ) ( $\delta$ , ppm) 164.7, 156.7, 129.3, 126.5, 124.9, 89.1, 67.4, 65.7, 61.3, 34.7, 30.6; HRMS (TOF MS  $\text{Cl}^+$ ) calculated for  $\text{C}_{15}\text{H}_{21}\text{O}_4$   $[\text{M}+\text{H}]^+$ : 265.1440, found 265.1445.

### 1,4-Dioxan-2-yl 4-methoxybenzoate

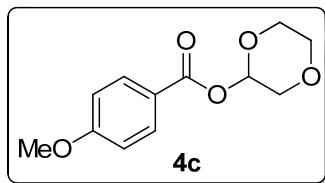

White oil; 43.1 mg; 60% yield;  $^1\text{H}$  NMR (400 MHz,  $\text{CDCl}_3$ ) ( $\delta$ , ppm) 8.11-8.08 (m, 2H), 6.97-6.93 (m, 2H), 6.09 (t,  $J = 1.9$  Hz, 1H), 4.26-4.19 (m, 1H), 3.90-3.82 (comp, 7H), 3.69 (dt,  $J = 11.8$  Hz, 2.7 Hz, 1H);  $^{13}\text{C}$  NMR (100 MHz,  $\text{CDCl}_3$ ) ( $\delta$ , ppm) 164.9, 163.8, 132.0, 122.0, 113.7, 89.5, 67.9, 66.2, 61.8, 55.5; HRMS (TOF MS  $\text{Cl}^+$ ) calculated for  $\text{C}_{12}\text{H}_{15}\text{O}_5$   $[\text{M}+\text{H}]^+$ : 239.0919, found 239.0918.

### 1,4-Dioxan-2-yl 4-methylbenzoate

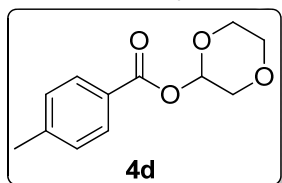

White oil; 53.5 mg; 80% yield;  $^1\text{H}$  NMR (400 MHz,  $\text{CDCl}_3$ ) ( $\delta$ , ppm) 8.07 (d,  $J = 8.2$  Hz, 2H), 7.32-7.30 (m, 2H), 6.14 (t,  $J = 1.9$  Hz, 1H), 4.30-4.24 (m, 1H), 3.94 (m, 2H), 3.88 (dd,  $J = 6.8$  Hz, 2.6 Hz, 2H), 3.73 (dt,  $J = 11.7$  Hz, 2.7 Hz, 1H), 2.47 (s, 3H);  $^{13}\text{C}$  NMR (100 MHz,  $\text{CDCl}_3$ ) ( $\delta$ , ppm) 164.8, 143.7, 129.5, 128.7, 126.5, 89.2, 67.4, 65.7, 61.3, 21.2; HRMS (TOF MS  $\text{Cl}^+$ ) calculated for  $\text{C}_{12}\text{H}_{15}\text{O}_4$   $[\text{M}+\text{H}]^+$ : 223.0970, found 223.0973.

### 1,4-Dioxan-2-yl 4-(trifluoromethyl)benzoate

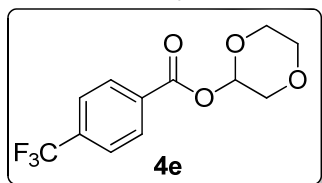



White oil; 70.6 mg; 85% yield;  $^1\text{H}$  NMR (400 MHz,  $\text{CDCl}_3$ ) ( $\delta$ , ppm) 8.25 (d,  $J = 8.1$  Hz, 2H), 7.74 (d,  $J = 8.2$  Hz, 2H), 6.13 (s, 1H), 4.26-4.20 (m, 1H), 3.92 (d,  $J = 1.8$  Hz, 2H), 3.86 (dd,  $J = 6.8$  Hz, 2.3, 2H), 3.71 (dt,  $J = 11.8$  Hz, 2.4, 1H);  $^{13}\text{C}$  NMR (100 MHz,  $\text{CDCl}_3$ ) ( $\delta$ , ppm) 164.1, 134.9 (d,  $J = 33.0$  Hz), 133.0, 130.3, 125.5 (q,  $J = 3.7$  Hz), 122.2, 90.4, 67.1, 66.1, 61.8; HRMS (TOF MS  $\text{Cl}^+$ ) calculated for  $\text{C}_{12}\text{H}_{12}\text{F}_3\text{O}_4$   $[\text{M}+\text{H}]^+$ : 277.0688, found 277.0685.

#### 1,4-Dioxan-2-yl 2-benzoylbenzoate

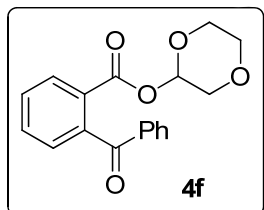

White oil; 77.0 mg; 82% yield;  $^1\text{H}$  NMR (400 MHz,  $\text{CDCl}_3$ ) ( $\delta$ , ppm) 8.18 (dd,  $J = 7.8$  Hz, 1.0 Hz, 1H), 7.81-7.79 (m, 2H), 7.67 (td,  $J = 7.5$  Hz, 1.3 Hz, 1H), 7.62-7.53 (m, 2H), 7.47-7.39 (m, 3H), 5.85 (s, 1H), 3.88-3.82 (m, 1H), 3.70-3.60 (comp, 3H), 3.51-3.47 (m, 2H);  $^{13}\text{C}$  NMR (100 MHz,  $\text{CDCl}_3$ ) ( $\delta$ , ppm) 196.2, 164.1, 141.6, 136.4, 132.8, 132.2, 130.2, 129.3, 129.0, 128.1, 127.9, 127.1, 90.1, 66.7, 65.3, 61.1; HRMS (TOF MS  $\text{Cl}^+$ ) calculated for  $\text{C}_{18}\text{H}_{17}\text{O}_5$   $[\text{M}+\text{H}]^+$ : 313.1076, found 313.1077.

#### 1,4-Dioxan-2-yl 4-fluorobenzoate

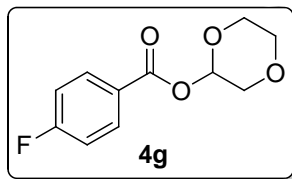

White oil; 68.1 mg; 65% yield;  $^1\text{H}$  NMR (400 MHz,  $\text{CDCl}_3$ ) ( $\delta$ , ppm) 8.18-8.13 (m, 2H), 7.17-7.12 (m, 2H), 6.10 (s, 1H), 4.25-4.19 (m, 1H), 3.90 (d,  $J = 1.9$  Hz, 2H), 3.84 (dd,  $J = 6.8$  Hz, 2.5 Hz, 2H), 3.70 (dt,  $J = 11.8$  Hz, 2.5 Hz, 1H);  $^{13}\text{C}$  NMR (100 MHz,  $\text{CDCl}_3$ ) ( $\delta$ , ppm) 166.0 (d,  $J = 250.0$  Hz), 164.3, 132.5 (d,  $J = 9.4$  Hz), 126.0 (d,  $J = 2.9$  Hz), 115.7 (d,  $J = 21.9$  Hz), 89.9, 67.8, 66.1, 61.8; HRMS (TOF MS  $\text{Cl}^+$ ) calculated for  $\text{C}_{11}\text{H}_{12}\text{FO}_4$   $[\text{M}+\text{H}]^+$ : 227.0720, found 227.0724.

#### 1,4-Dioxan-2-yl furan-2-carboxylate

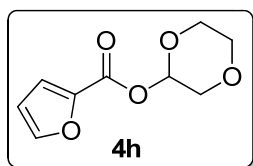

White oil; 44.2 mg; 74% yield;  $^1\text{H}$  NMR (400 MHz,  $\text{CDCl}_3$ ) ( $\delta$ , ppm) 7.66 (m, 1H), 7.35-7.33 (m, 1H), 6.58-6.57 (m, 1H), 6.11 (s, 1H), 4.28-4.21 (m, 1H), 3.91 (d,  $J = 1.9$  Hz, 2H), 3.87-3.85 (m, 2H), 3.71 (dt,  $J = 11.7$  Hz, 2.5 Hz, 1H);  $^{13}\text{C}$  NMR (100 MHz,  $\text{CDCl}_3$ ) ( $\delta$ , ppm) 156.8, 146.4, 143.6, 118.5, 111.5, 89.3, 67.2, 65.6, 61.3; HRMS (TOF MS  $\text{Cl}^+$ ) calculated for  $\text{C}_9\text{H}_{11}\text{O}_5$   $[\text{M}+\text{H}]^+$ : 199.0606, found 199.0609.

### 1,4-Dioxan-2-yl 2-naphthoate

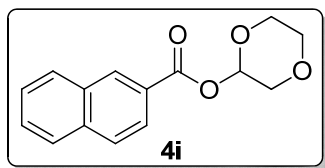

White oil; 55.2 mg; 71% yield;  $^1\text{H}$  NMR (400 MHz,  $\text{CDCl}_3$ ) ( $\delta$ , ppm) 8.76 (s, 1H), 8.19 (dd,  $J = 8.6$  Hz, 1.7 Hz, 1H), 8.04 (d,  $J = 8.0$  Hz, 1H), 7.96-7.93 (m, 2H), 7.68-7.59 (m, 2H), 6.23 (t,  $J = 1.9$  Hz, 1H), 4.37-4.31 (m, 1H), 4.01-4.00 (m, 2H), 3.93-3.91 (m, 2H), 3.77 (dt,  $J = 11.8$  Hz, 2.6 Hz, 1H);  $^{13}\text{C}$  NMR (100 MHz,  $\text{CDCl}_3$ ) ( $\delta$ , ppm) 164.9, 135.3, 132.0, 131.1, 129.0, 128.0, 127.8, 127.3, 126.5, 126.3, 124.9, 89.4, 67.5, 65.7, 61.4; HRMS (TOF MS  $\text{Cl}^+$ ) calculated for  $\text{C}_{15}\text{H}_{15}\text{O}_4$   $[\text{M}+\text{H}]^+$ : 259.0970, found 259.0961.

### 1,4-Dioxan-2-yl 3-phenylpropanoate

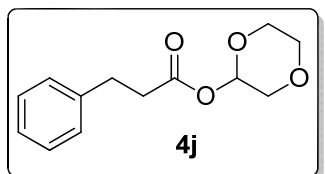

White oil; 59.0 mg; 83% yield;  $^1\text{H}$  NMR (400 MHz,  $\text{CDCl}_3$ ) ( $\delta$ , ppm) 7.37-7.31 (m, 2H), 7.28-7.24 (comp, 3H), 5.91 (t,  $J = 2.0$  Hz, 1H), 4.12-4.04 (m, 1H), 3.84-3.71 (m, 4H), 3.64 (dt,  $J = 11.8$  Hz, 2.7 Hz, 1H), 3.05 (t,  $J = 7.8$  Hz, 2H), 2.81-2.77 (m, 2H);  $^{13}\text{C}$  NMR (100 MHz,  $\text{CDCl}_3$ ) ( $\delta$ , ppm) 171.2, 139.7, 128.1, 127.8, 125.9, 88.8, 67.2, 65.6, 61.2, 35.4, 30.3; HRMS (TOF MS  $\text{Cl}^+$ ) calculated for  $\text{C}_{13}\text{H}_{17}\text{O}_4$   $[\text{M}+\text{H}]^+$ : 237.1127, found 237.1124.

### (*E*)-1,4-Dioxan-2-yl 3-(3-nitrophenyl)acrylate

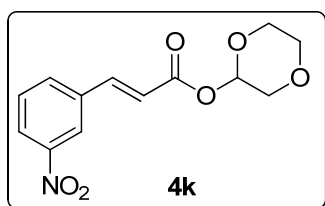

Yellow oil; 69.7 mg; 83% yield;  $^1\text{H}$  NMR (400 MHz,  $\text{CDCl}_3$ ) ( $\delta$ , ppm) 8.41 (s, 1H), 8.26 (dd,  $J = 8.2$  Hz, 1.3, 1H), 7.87-7.80 (m, 2H), 7.61 (t,  $J = 8.0$  Hz, 1H), 6.65 (d,  $J = 16.0$  Hz, 1H), 6.01 (s, 1H), 4.24-4.18 (m, 1H), 3.90-3.82 (comp, 4H), 3.69 (dt,  $J = 11.8$  Hz, 2.4 Hz, 1H);  $^{13}\text{C}$  NMR (100 MHz,  $\text{CDCl}_3$ ) ( $\delta$ , ppm) 164.2, 148.2, 142.6, 135.4, 133.2, 129.6, 124.3, 122.1, 120.2, 89.3, 67.3, 65.6, 61.2; HRMS (TOF MS  $\text{Cl}^+$ ) calculated for  $\text{C}_{13}\text{H}_{14}\text{NO}_6$   $[\text{M}+\text{H}]^+$ : 280.0821, found 280.0824.

### 1,4-Dioxan-2-yl cinnamate

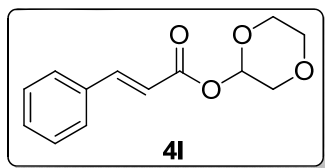

White oil; 42.3 mg; 60% yield;  $^1\text{H NMR}$  (400 MHz,  $\text{CDCl}_3$ ) ( $\delta$ , ppm) 7.81 (d,  $J = 16.0$  Hz, 1H), 7.58-7.56 (m, 2H), 7.43-7.42 (comp, 3H), 6.54 (d,  $J = 16.0$  Hz, 1H), 6.02 (t,  $J = 1.8$  Hz, 1H), 4.25-4.19 (m, 1H), 3.91-3.83 (comp, 4H), 3.69 (dt,  $J = 11.7$  Hz, 2.6 Hz, 1H);  $^{13}\text{C NMR}$  (100 MHz,  $\text{CDCl}_3$ ) ( $\delta$ , ppm) 165.6, 146.2, 134.2, 130.6, 129.0, 128.3, 117.4, 89.4, 67.9, 66.2, 61.7; HRMS (TOF MS  $\text{Cl}^+$ ) calculated for  $\text{C}_{13}\text{H}_{15}\text{O}_4$   $[\text{M}+\text{H}]^+$ : 235.0970, found 235.0979.

### (*E*)-1,4-Dioxan-2-yl 3-(4-isopropylphenyl)acrylate

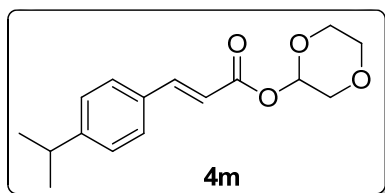

White oil; 59.0 mg; 71% yield;  $^1\text{H NMR}$  (400 MHz,  $\text{CDCl}_3$ ) ( $\delta$ , ppm) 7.82 (d,  $J = 16.0$  Hz, 1H), 7.53 (d,  $J = 8.2$  Hz, 2H), 7.31 (d,  $J = 8.2$  Hz, 2H), 6.53 (d,  $J = 16.0$  Hz, 1H), 6.04 (t,  $J = 1.9$  Hz, 1H), 4.27-4.21 (m, 1H), 3.93-3.85 (comp, 4H), 3.72 (dt,  $J = 11.7$  Hz, 2.7 Hz, 1H), 3.03-2.93 (m, 1H), 1.32-1.30 (comp, 6H);  $^{13}\text{C NMR}$  (100 MHz,  $\text{CDCl}_3$ ) ( $\delta$ , ppm) 165.3, 151.5, 145.7, 131.4, 127.9, 126.6, 115.9, 88.8, 67.4, 65.7, 61.3, 33.6, 23.3; HRMS (TOF MS  $\text{Cl}^+$ ) calculated for  $\text{C}_{16}\text{H}_{21}\text{O}_4$   $[\text{M}+\text{H}]^+$ : 277.1440, found 277.1437.

### (*E*)-1,4-Dioxan-2-yl 3-(3-chlorophenyl)acrylate

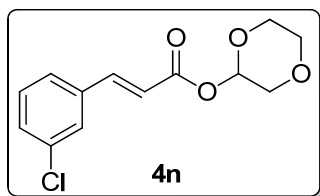

White oil; 51.6 mg; 64% yield;  $^1\text{H NMR}$  (400 MHz,  $\text{CDCl}_3$ ) ( $\delta$ , ppm) 7.75 (d,  $J = 16.0$  Hz, 1H), 7.57 (m, 1H), 7.46 (dt,  $J = 7.1$  Hz, 1.5 Hz, 1H), 7.43-7.36 (m, 2H), 6.56 (d,  $J = 16.0$  Hz, 1H), 6.03 (t,  $J = 1.9$  Hz, 1H), 4.26-4.20 (m, 1H), 3.93-3.85 (comp, 4H), 3.71 (dt,  $J = 11.7$  Hz, 2.6 Hz, 1H);  $^{13}\text{C NMR}$  (100 MHz,  $\text{CDCl}_3$ ) ( $\delta$ , ppm) 164.6, 143.9, 135.5, 134.5, 129.9, 129.7, 127.5, 125.9, 118.5, 89.1, 67.3, 65.6, 61.2; HRMS (TOF MS  $\text{Cl}^+$ ) calculated for  $\text{C}_{13}\text{H}_{14}\text{ClO}_4$   $[\text{M}+\text{H}]^+$ : 269.0581, found 269.0584.

### 1,3-Dioxolan-4-yl 3-phenylpropiolate

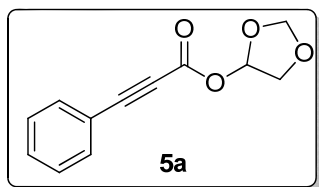

White oil; 19.7 mg; 30% yield;  $^1\text{H}$  NMR (400 MHz,  $\text{CDCl}_3$ ) ( $\delta$ , ppm) 7.66-7.64 (m, 2H), 7.55-7.50 (m, 1H), 7.46-7.42 (m, 2H), 6.51 (dd,  $J = 3.9$  Hz, 2.0 Hz, 1H), 5.25 (s, 1H), 5.19 (s, 1H), 4.19-4.12 (m, 2H);  $^{13}\text{C}$  NMR (100 MHz,  $\text{CDCl}_3$ ) ( $\delta$ , ppm) 152.6, 132.7, 130.5, 128.2, 118.7, 95.7, 94.7, 87.3, 79.6, 70.0; HRMS (TOF MS  $\text{Cl}^+$ ) calculated for  $\text{C}_{12}\text{H}_{11}\text{O}_4$   $[\text{M}+\text{H}]^+$ : 219.0657, found 219.0655.

### 1,2-Dimethoxyethyl 3-phenylpropiolate

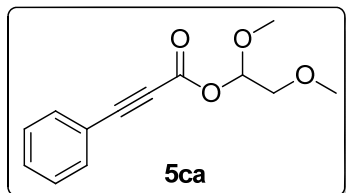

White oil; 26.5 mg; 37% yield;  $^1\text{H}$  NMR (400 MHz,  $\text{CDCl}_3$ ) ( $\delta$ , ppm) 7.61-7.59 (m, 2H), 7.49-7.45 (m, 1H), 7.39 (t,  $J = 7.4$  Hz, 2H), 6.01 (t,  $J = 4.9$  Hz, 1H), 3.59-3.57 (m, 2H), 3.55 (s, 3H), 3.44 (s, 3H);  $^{13}\text{C}$  NMR (100 MHz,  $\text{CDCl}_3$ ) ( $\delta$ , ppm) 153.6, 133.1, 130.9, 128.6, 119.4, 98.4, 87.6, 80.0, 72.4, 59.6, 57.5; HRMS (TOF MS  $\text{Cl}^+$ ) calculated for  $\text{C}_{13}\text{H}_{15}\text{O}_4$   $[\text{M}+\text{H}]^+$ : 235.0970, found 239.0962.

### (2-Methoxyethoxy)methyl 3-phenylpropiolate

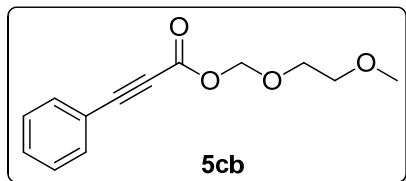

White oil; 24.7 mg; 35% yield;  $^1\text{H}$  NMR (400 MHz,  $\text{CDCl}_3$ ) ( $\delta$ , ppm) 7.62-7.60 (m, 2H), 7.48 (ddd,  $J = 6.6$  Hz, 3.9 Hz, 1.3 Hz, 1H), 7.40 (t,  $J = 7.4$  Hz, 2H), 5.48 (s, 2H), 3.90-3.88 (m, 2H), 3.62-3.60 (m, 2H), 3.42 (s, 3H);  $^{13}\text{C}$  NMR (100 MHz,  $\text{CDCl}_3$ ) ( $\delta$ , ppm) 153.4, 133.1, 130.8, 128.6, 119.4, 90.6, 87.2, 80.3, 71.4, 69.9, 59.1; HRMS (TOF MS  $\text{Cl}^+$ ) calculated for  $\text{C}_{13}\text{H}_{15}\text{O}_4$   $[\text{M}+\text{H}]^+$ : 235.0970, found 235.0969.

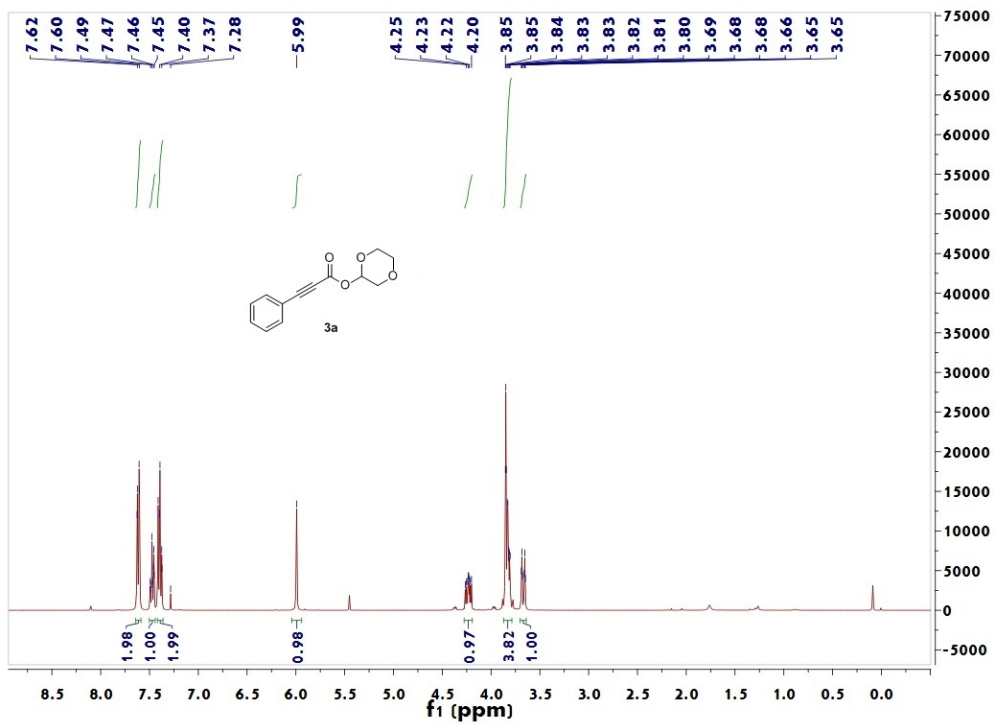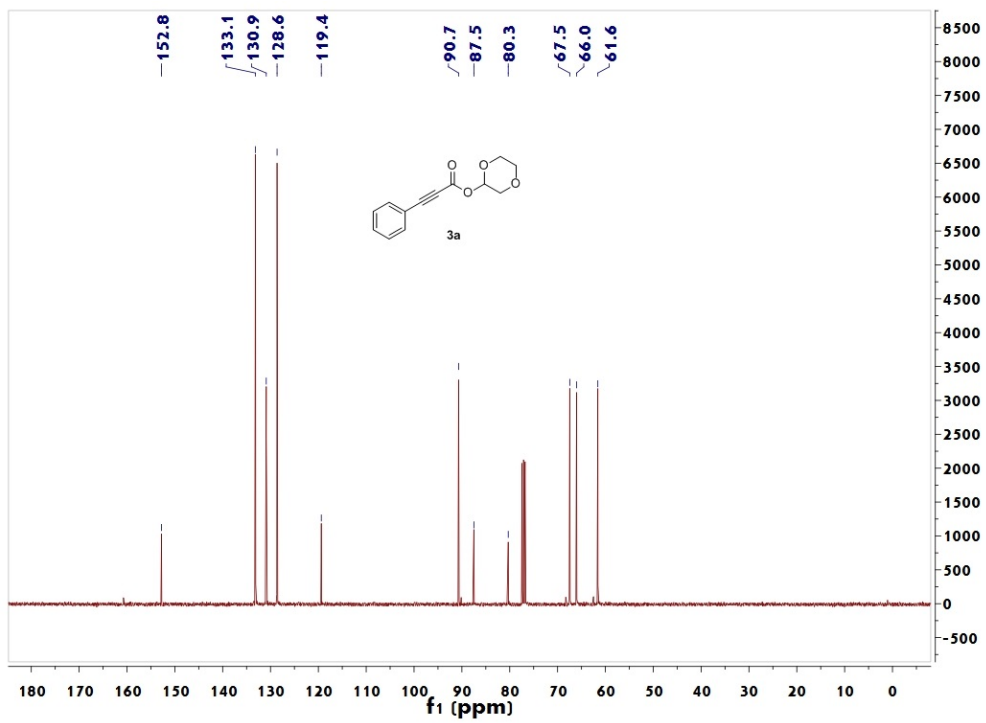

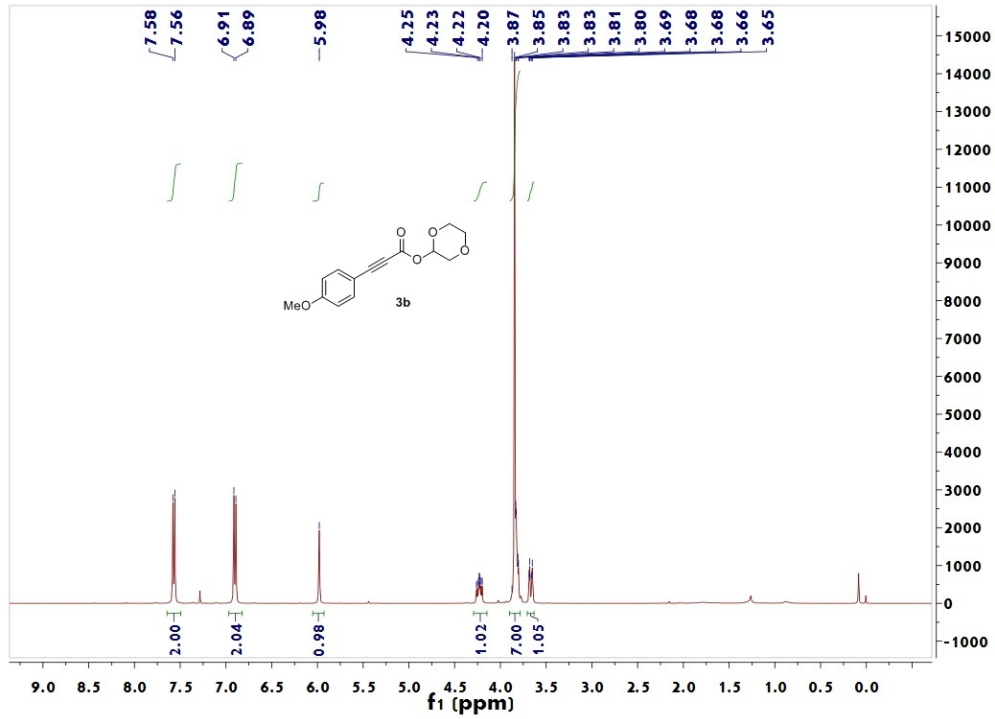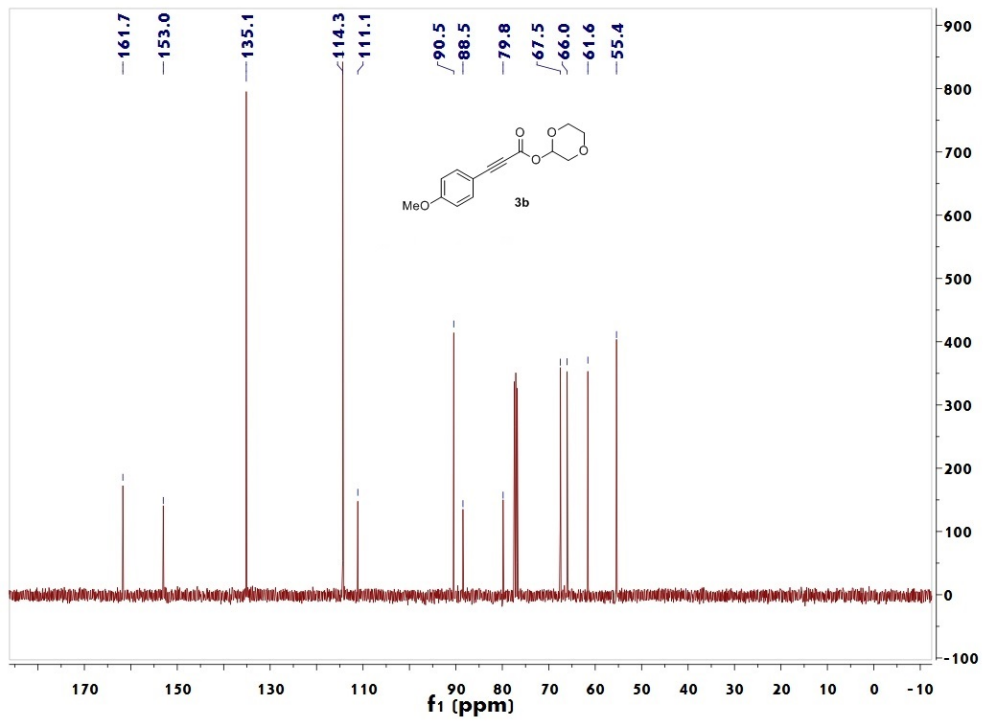

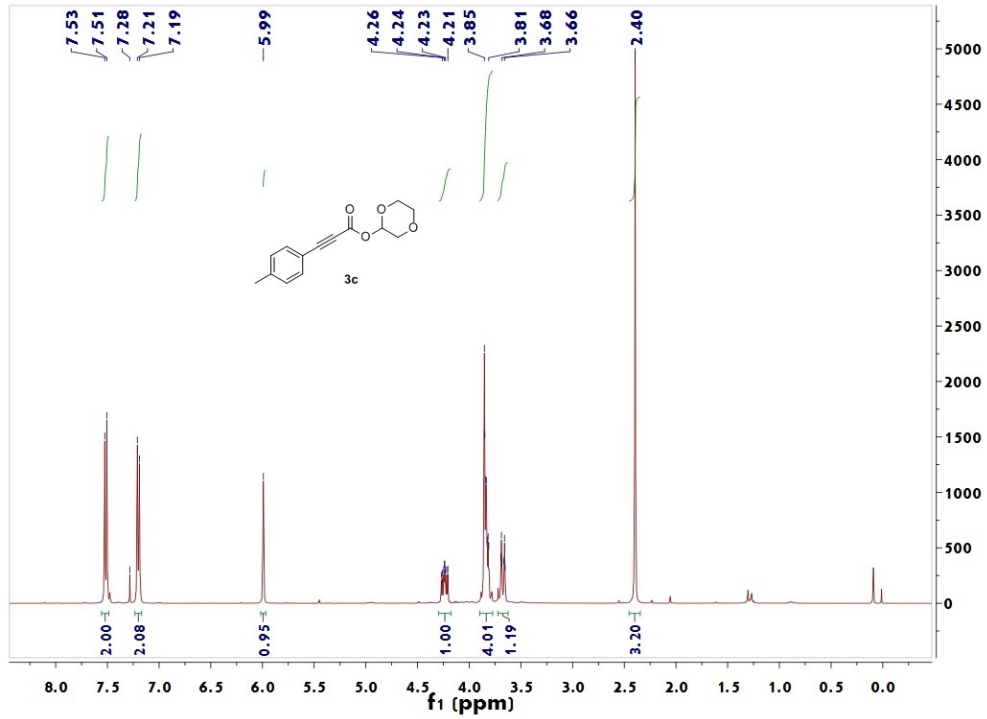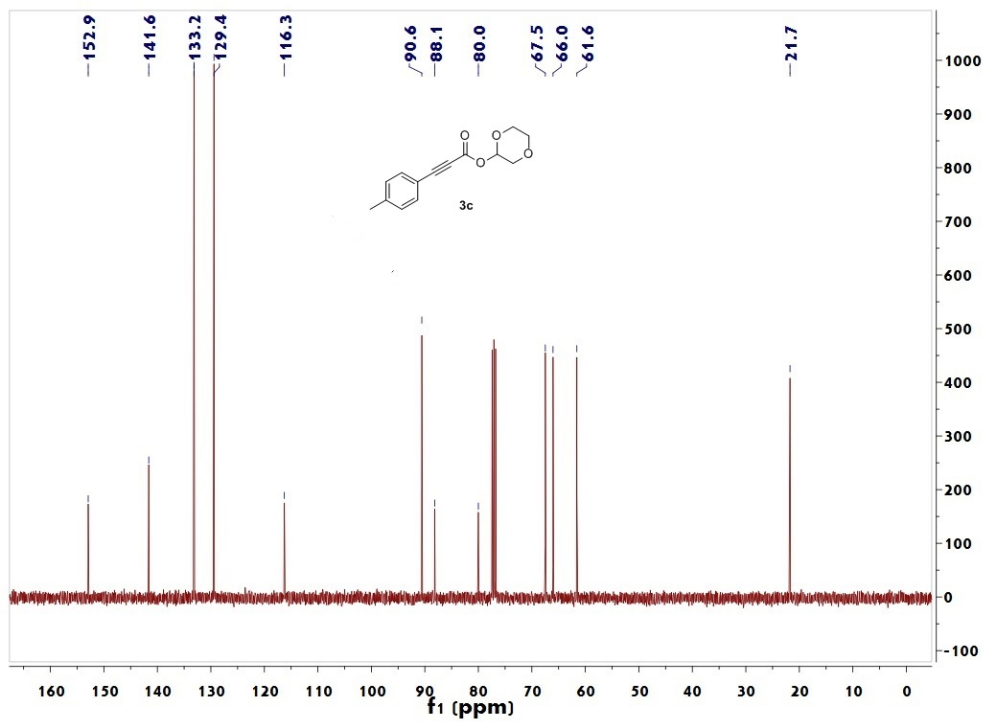

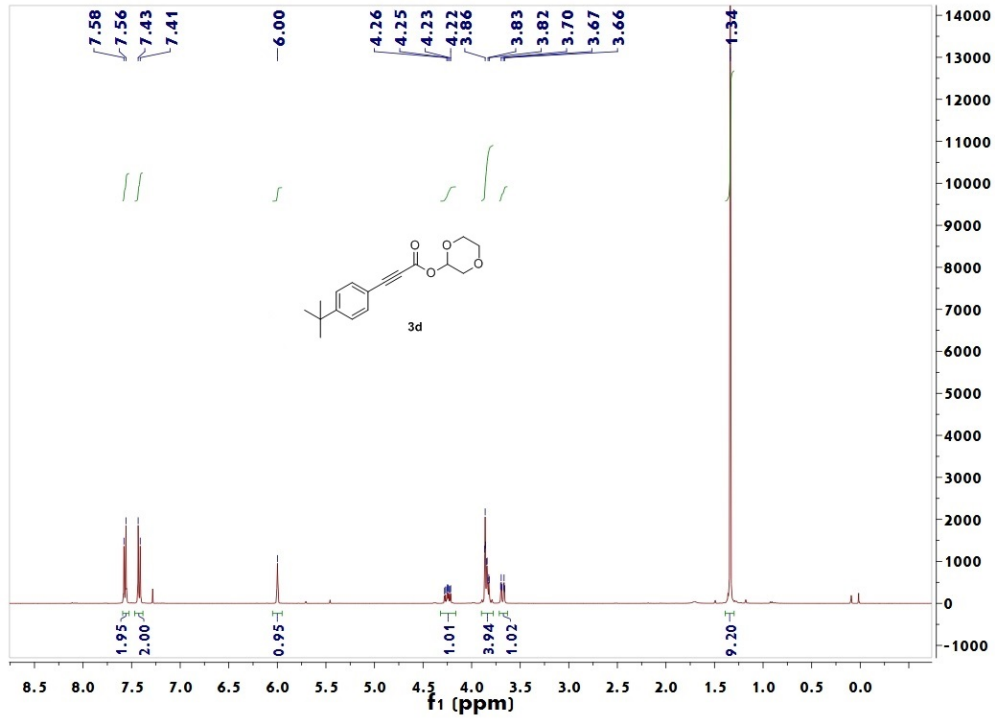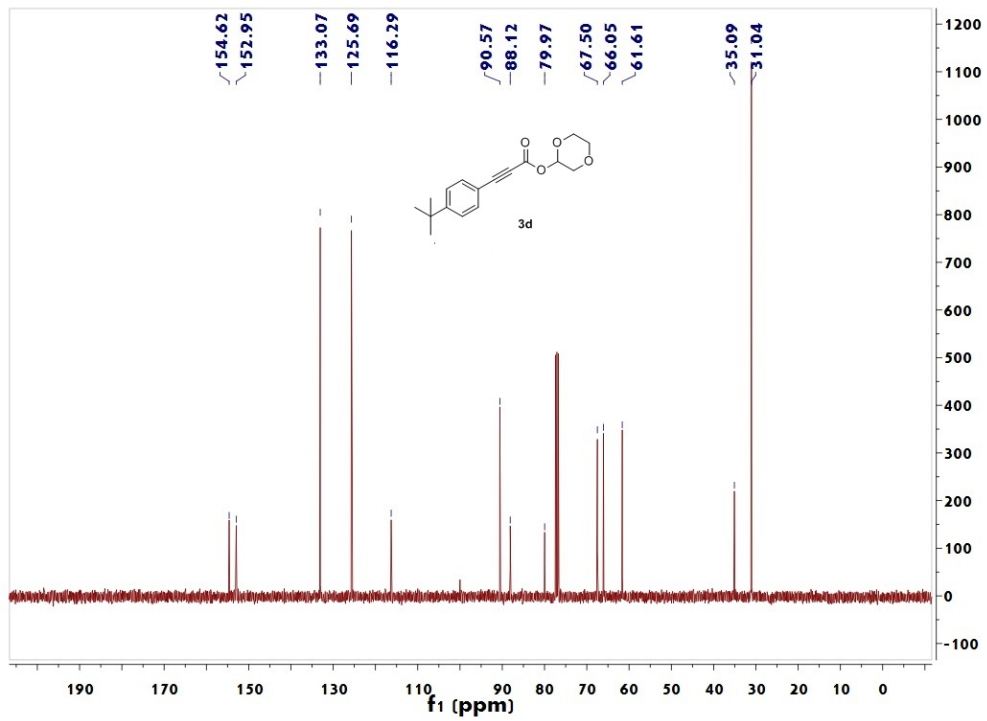



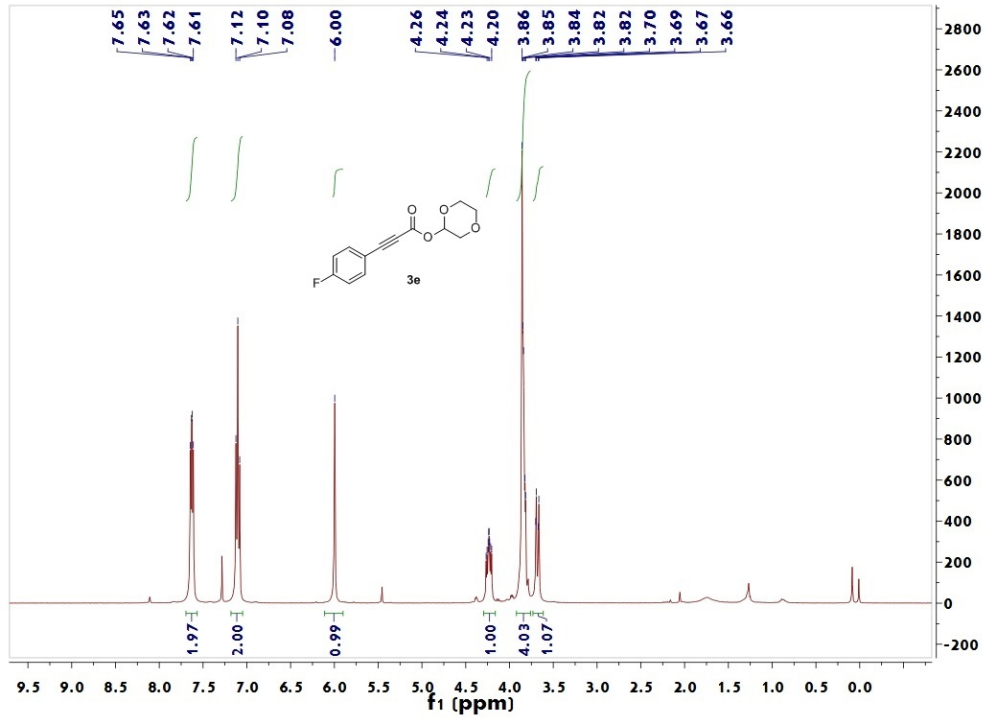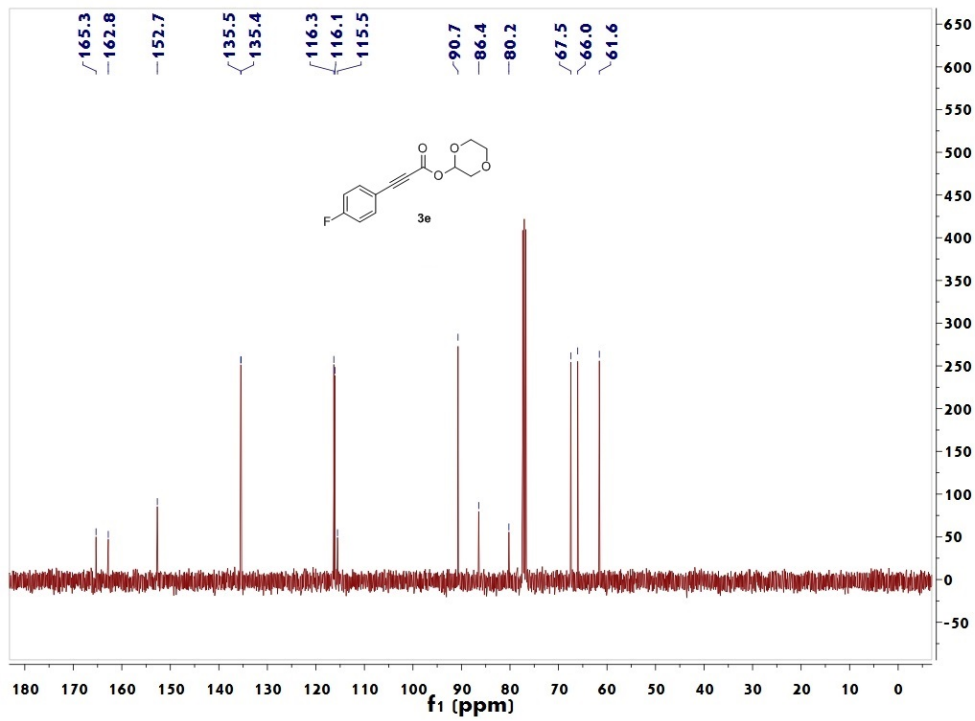

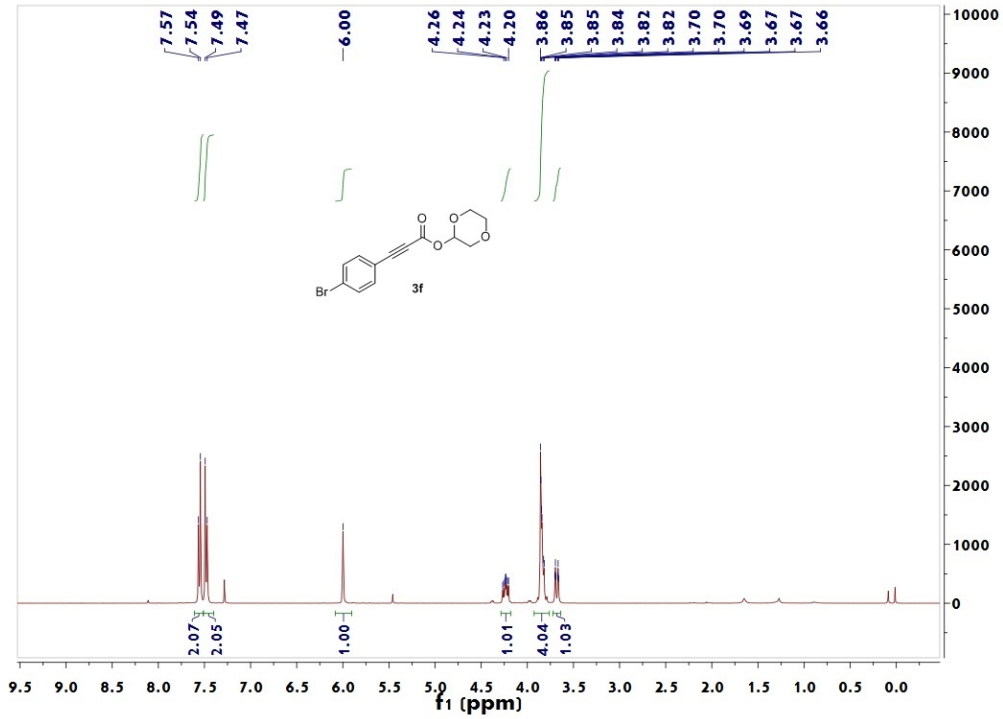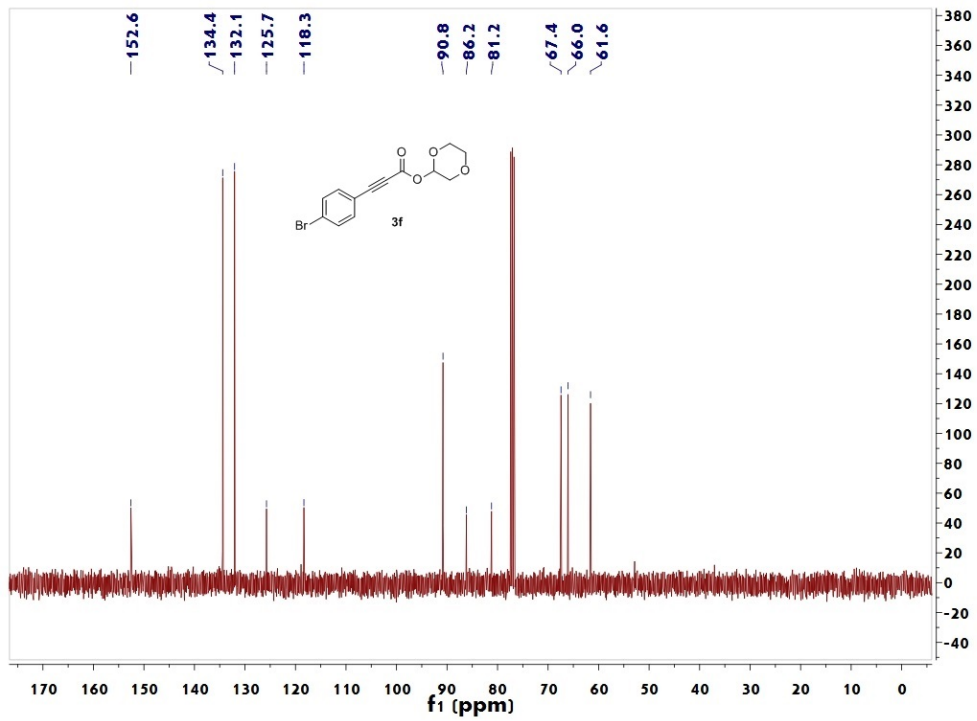

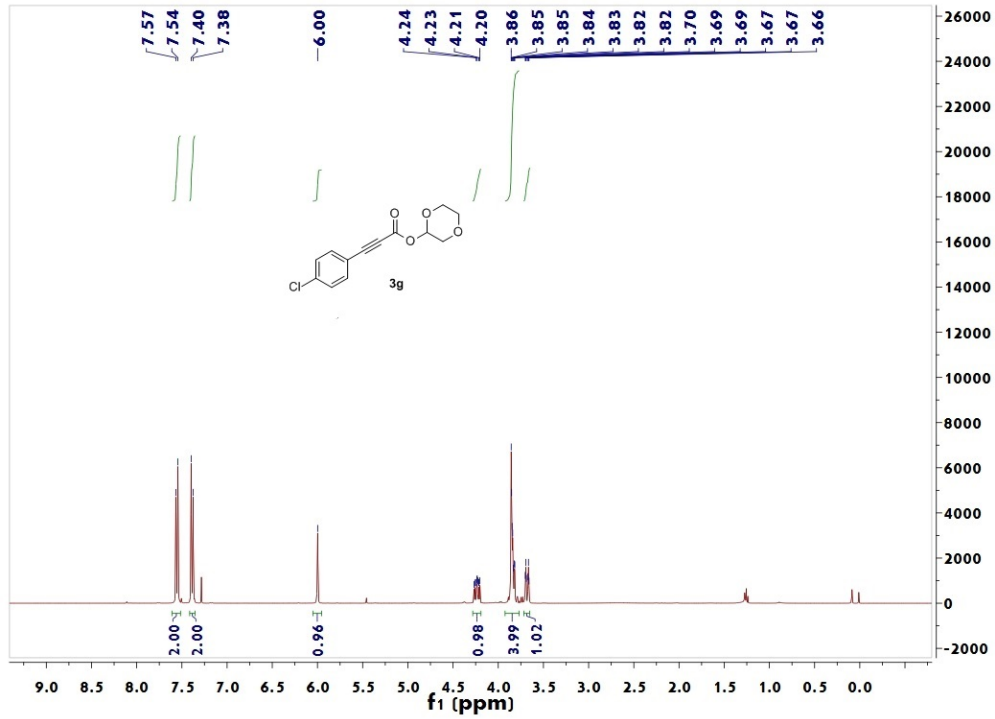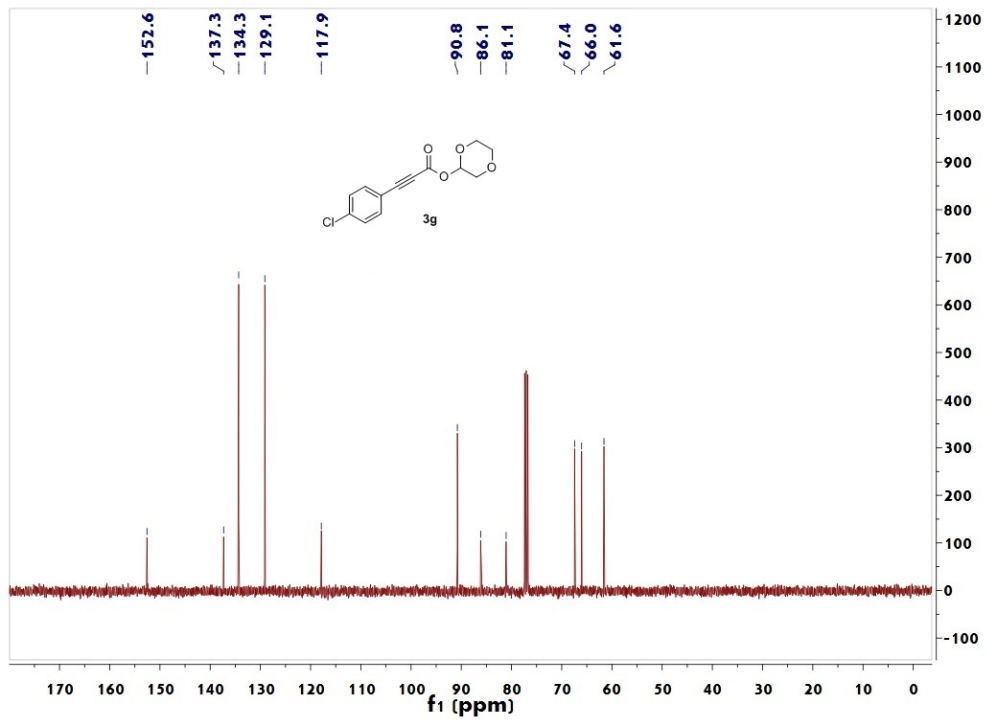

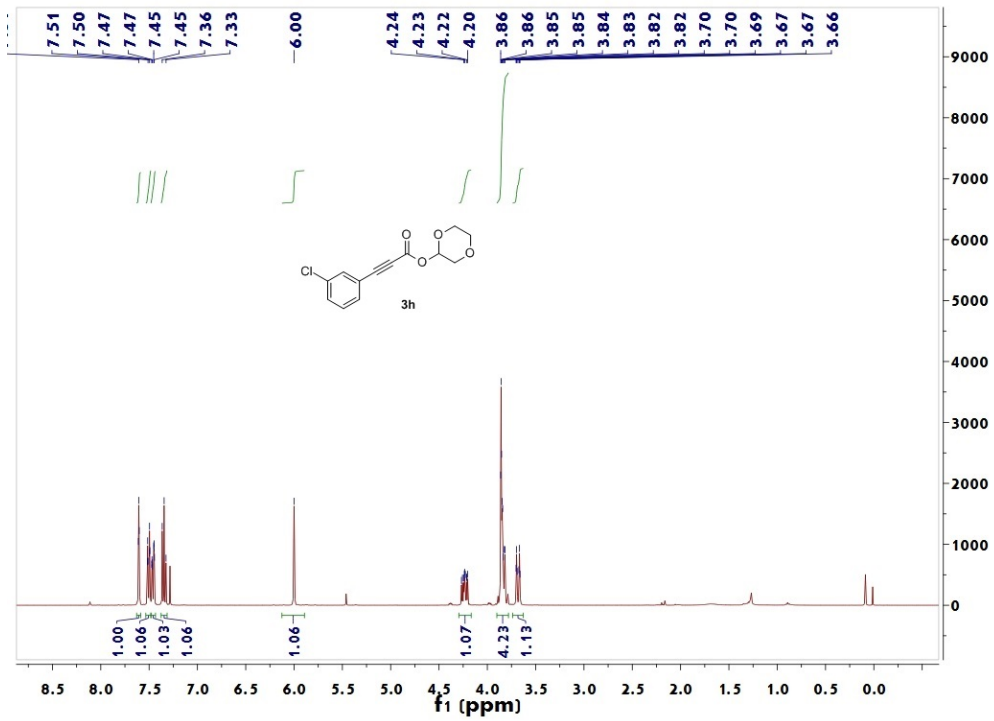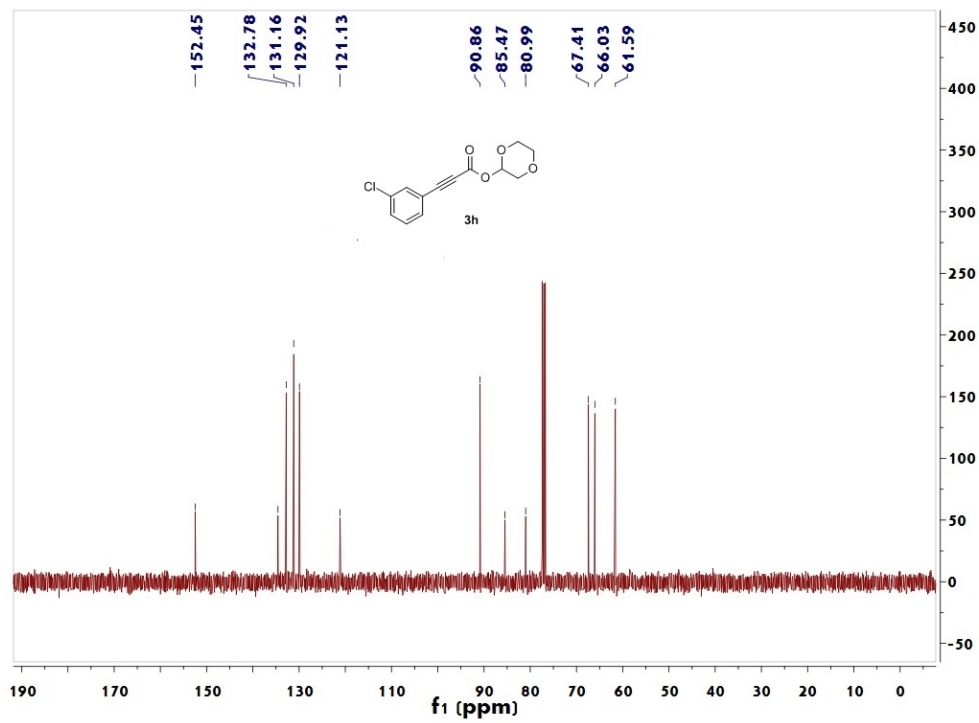

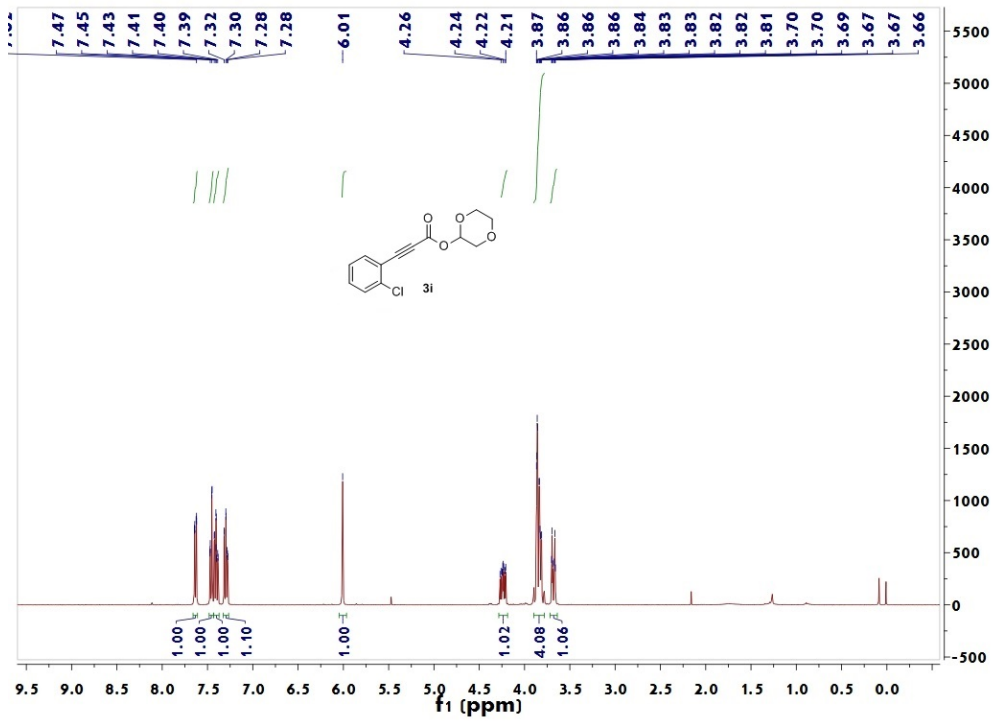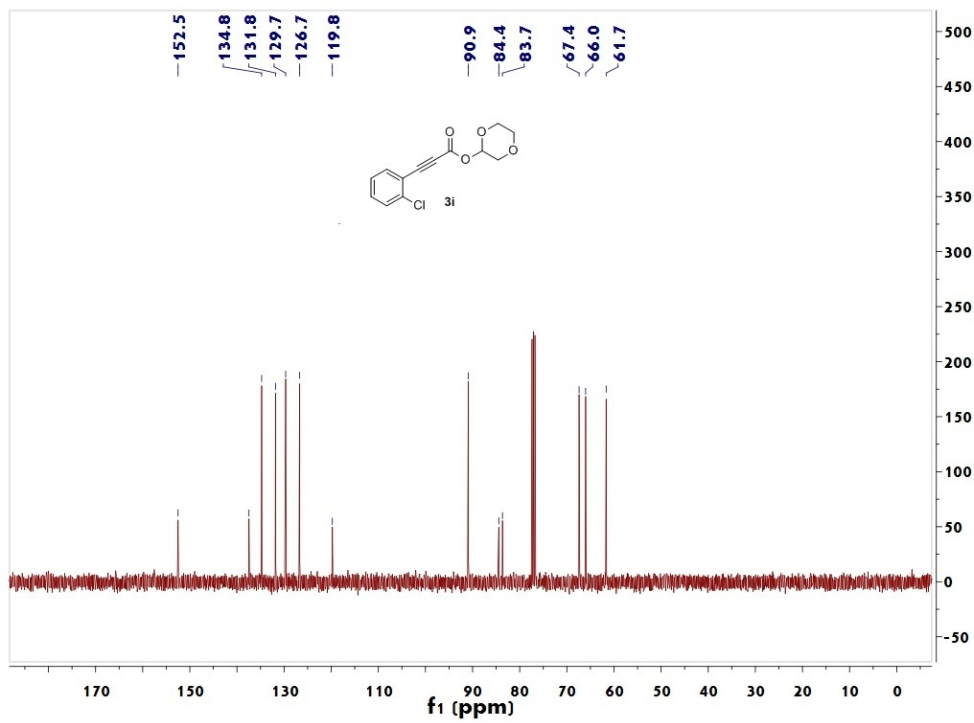

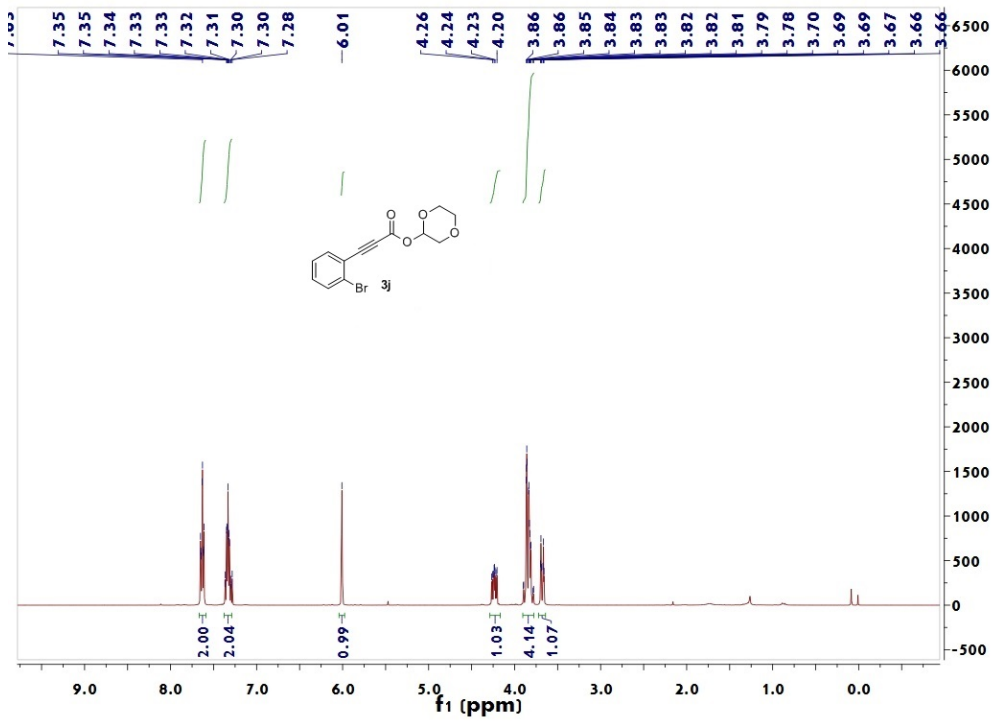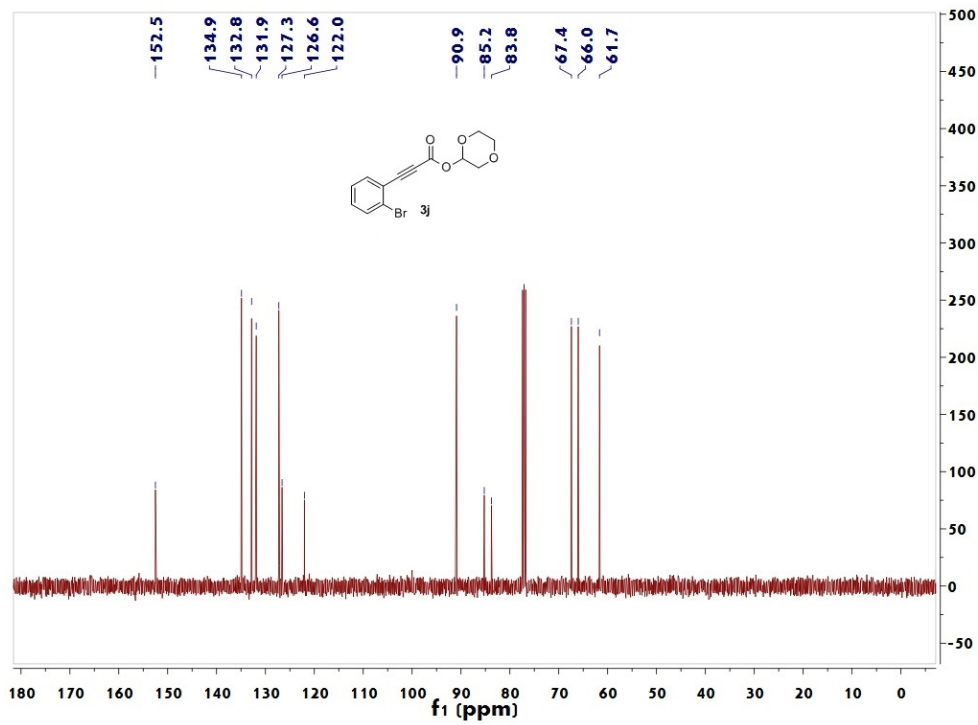

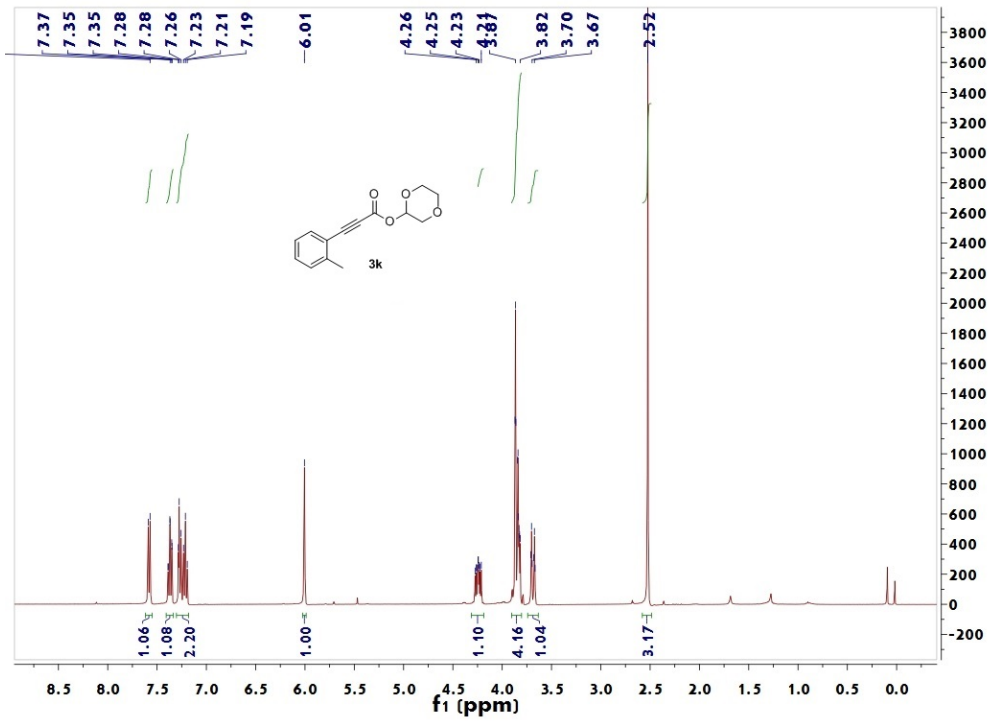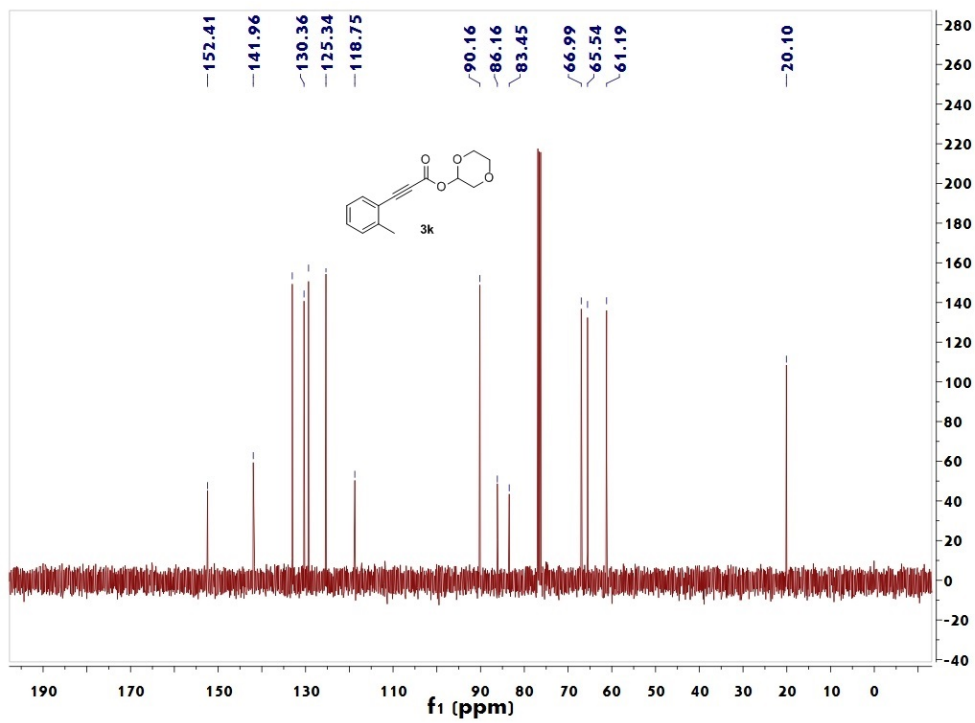

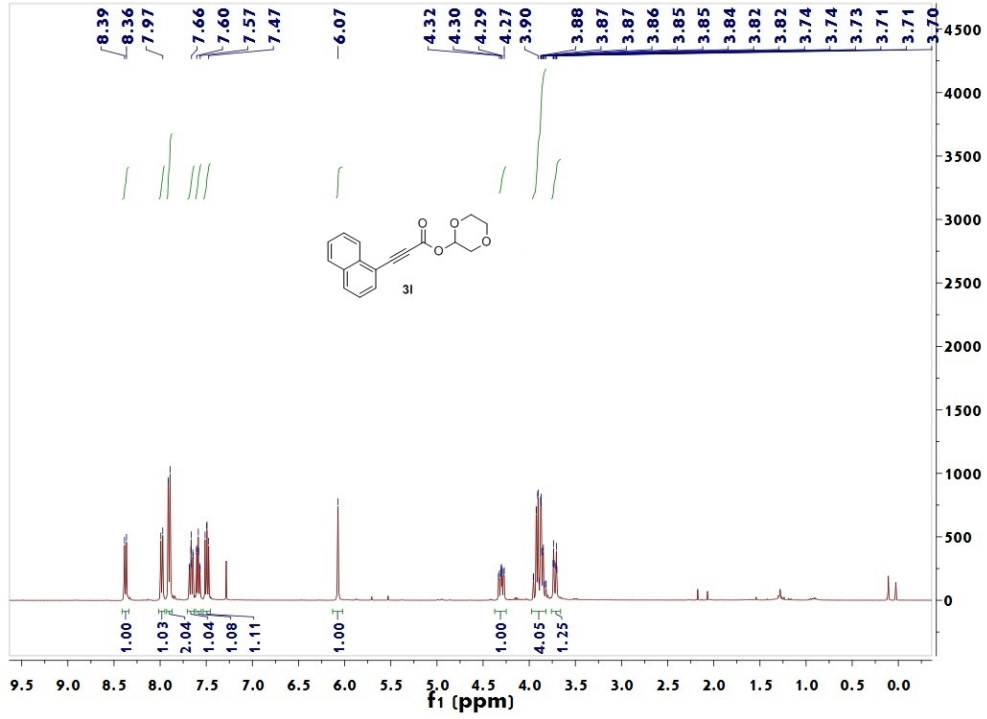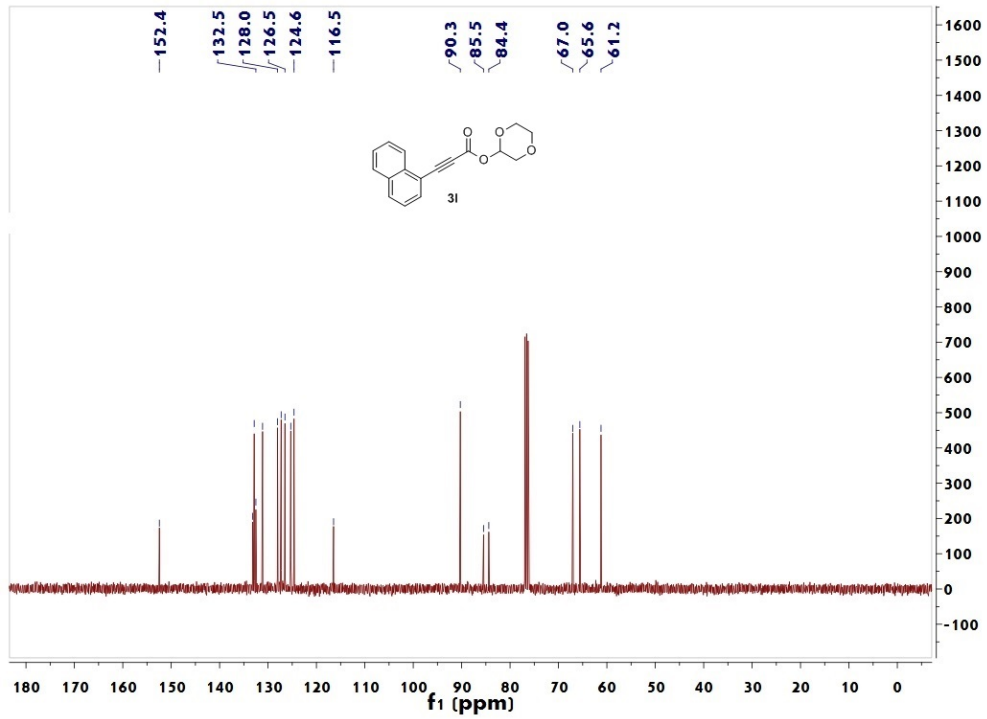



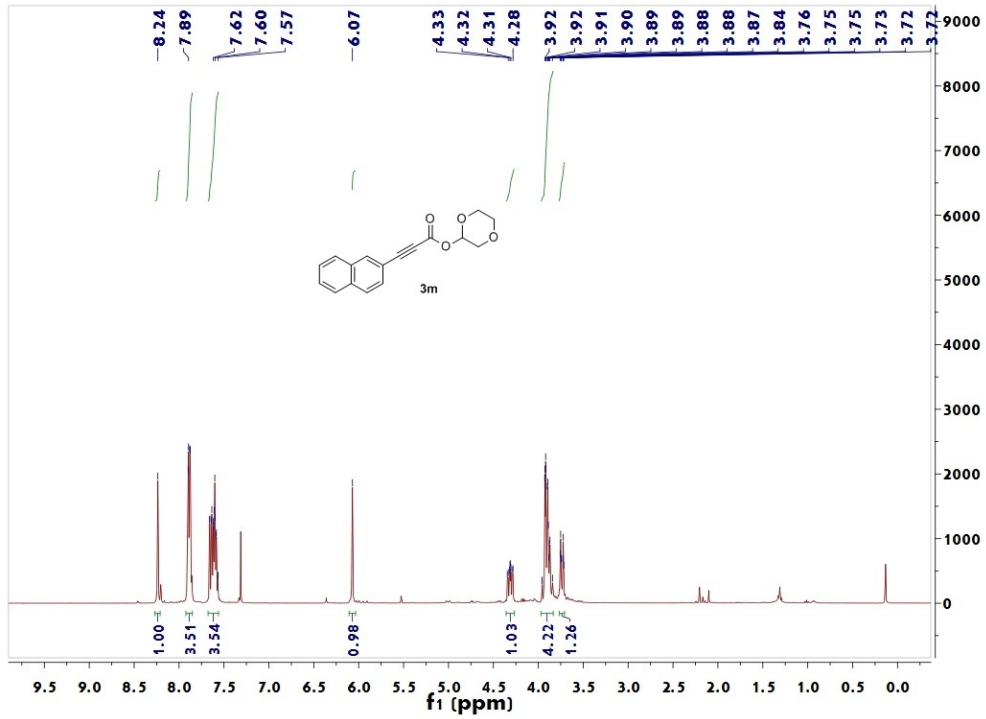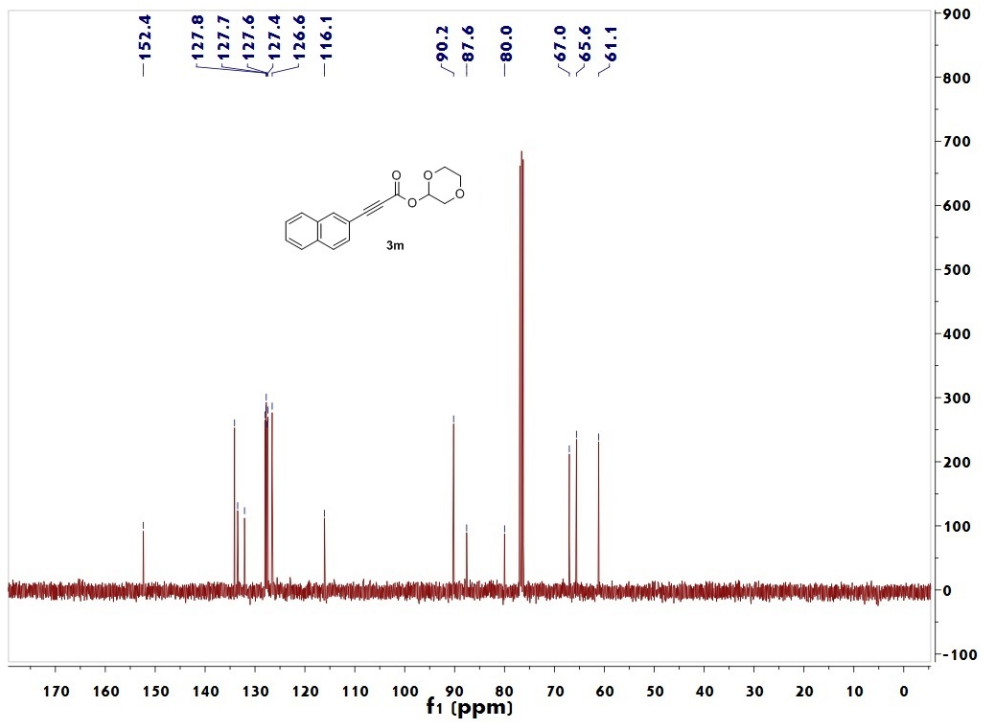

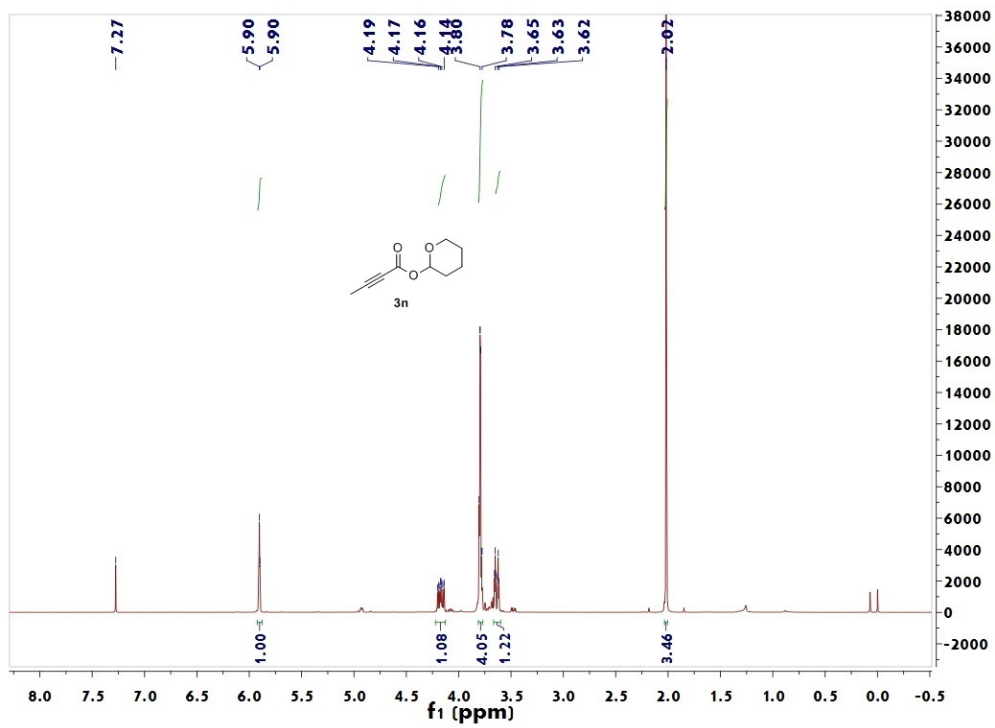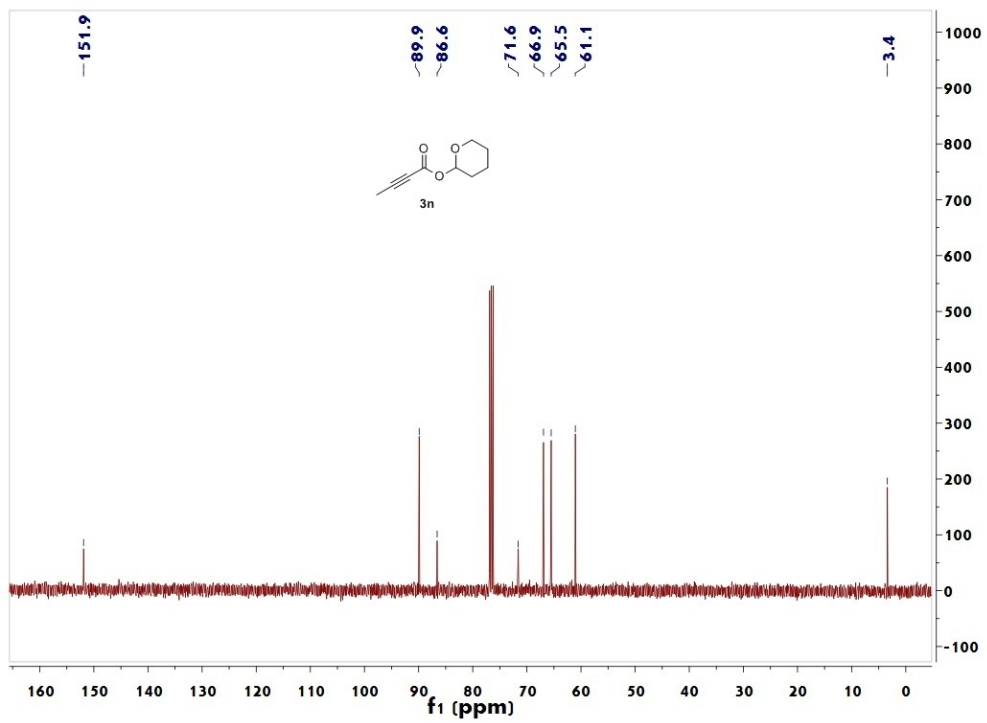

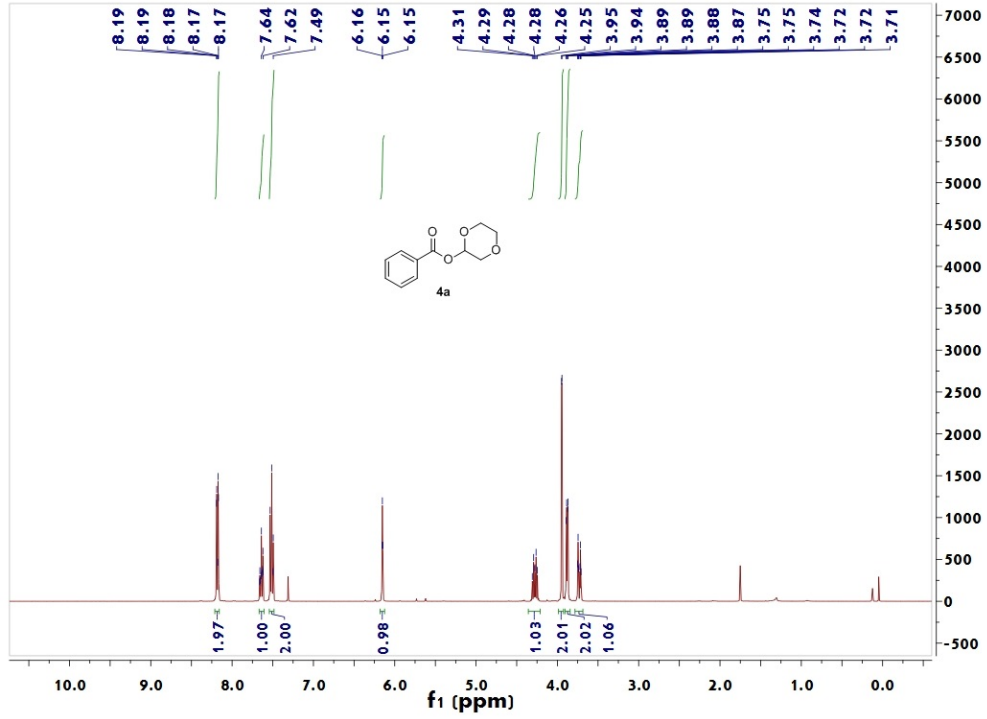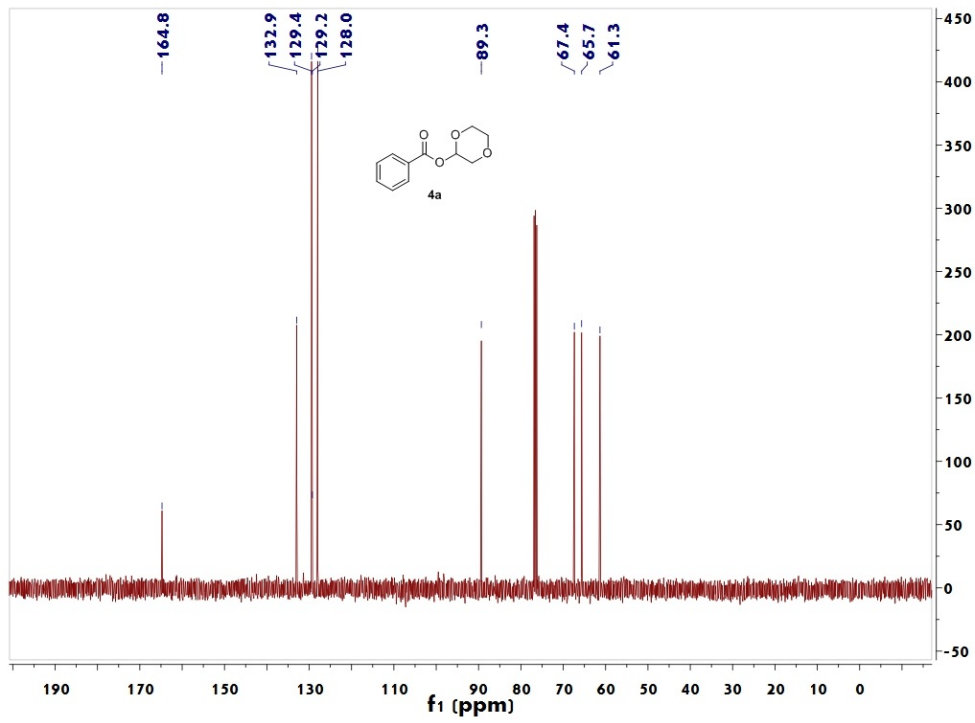

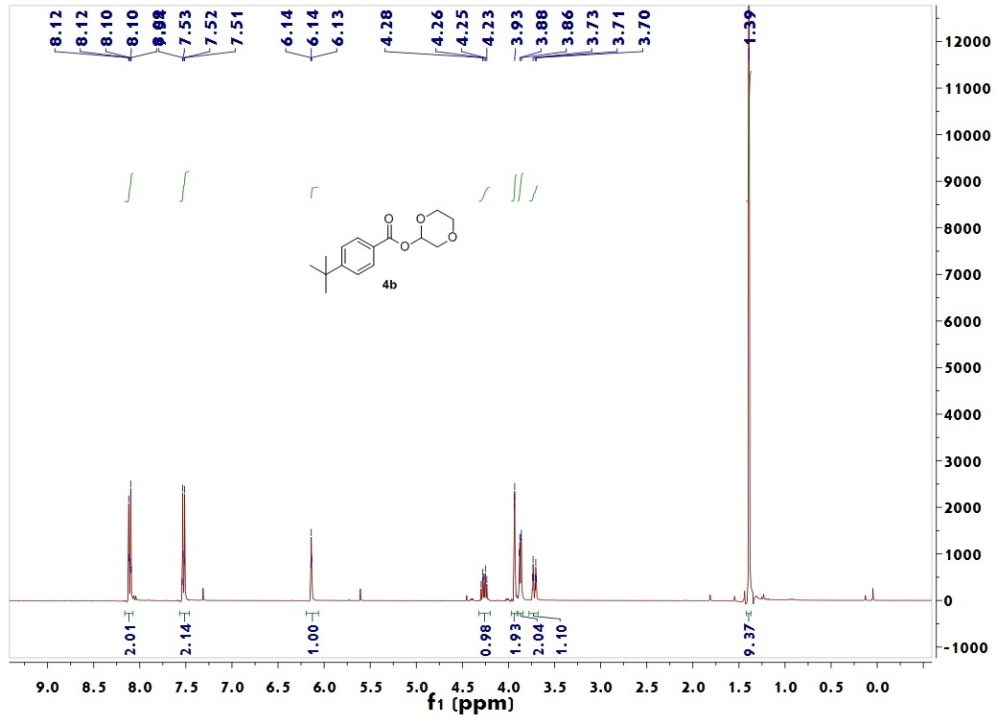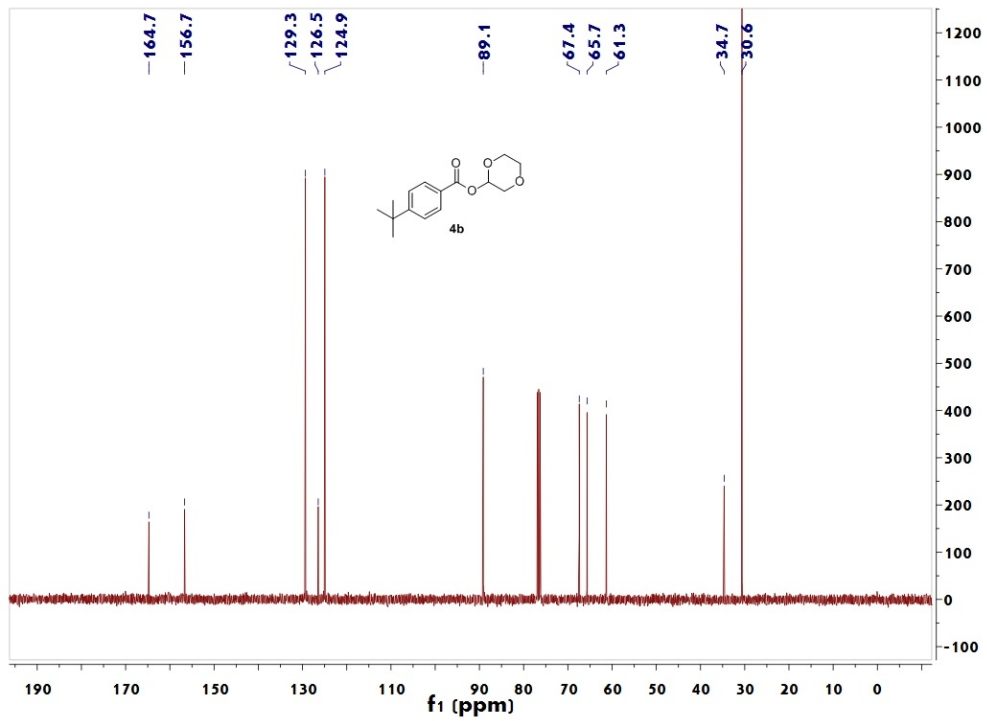

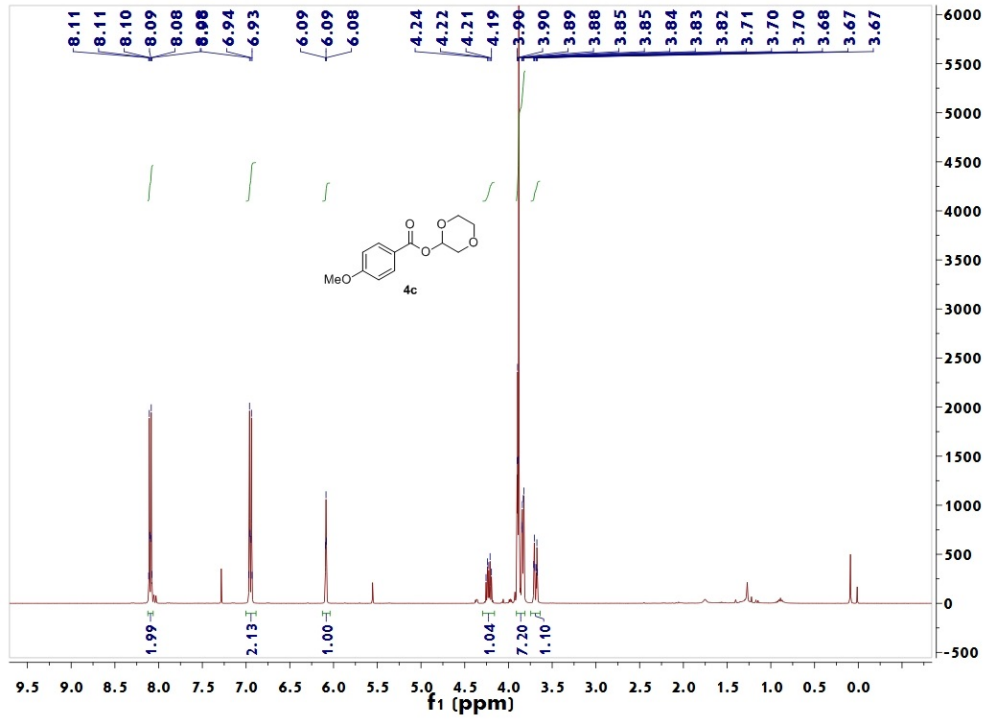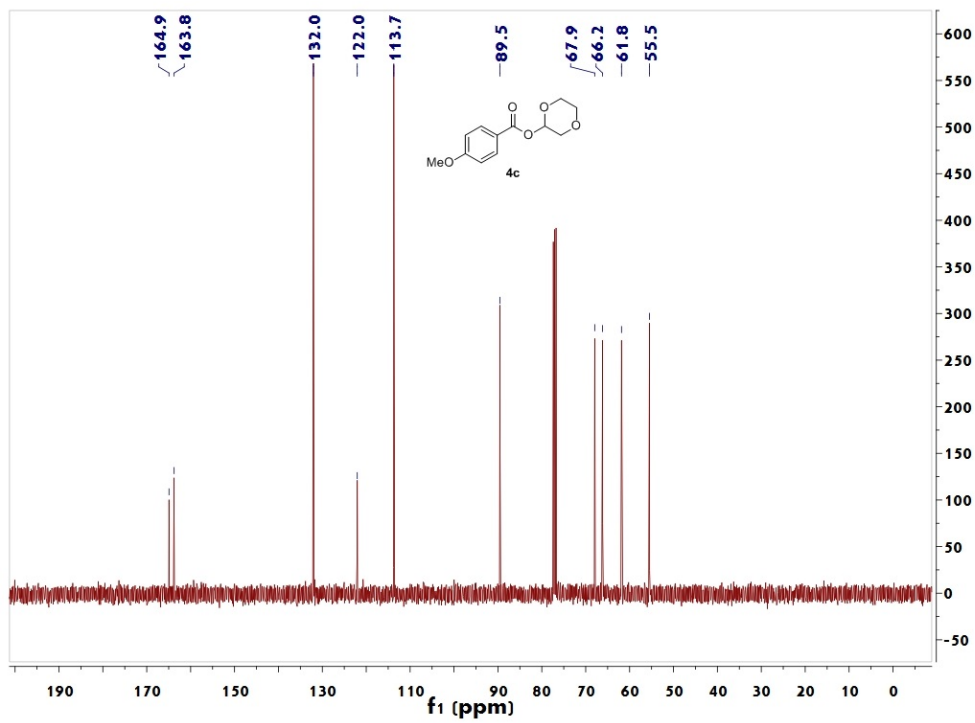

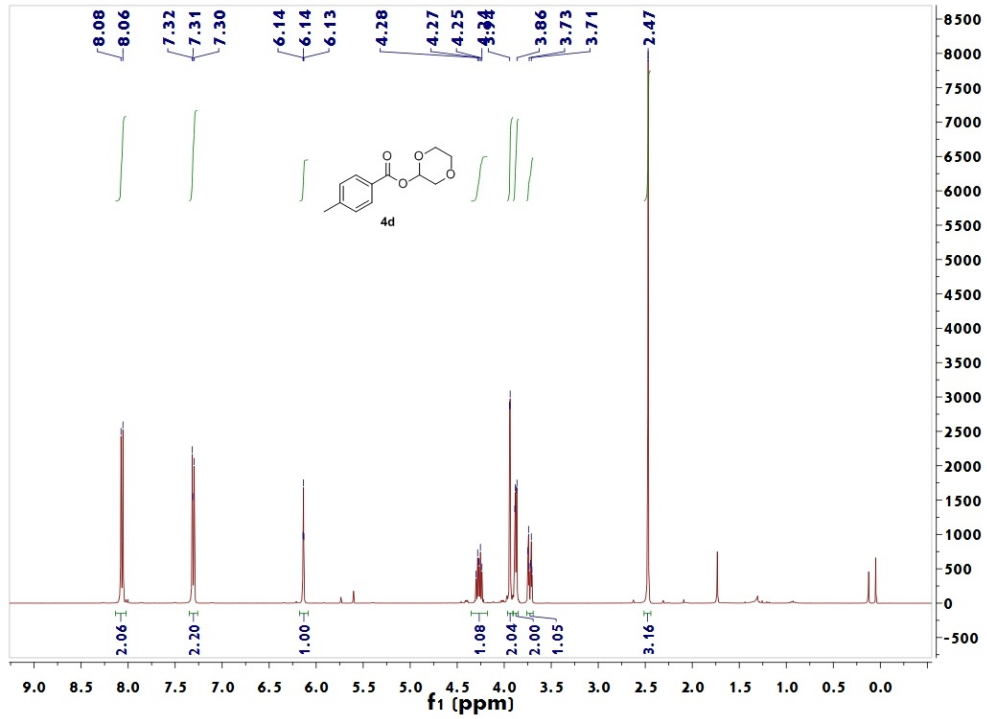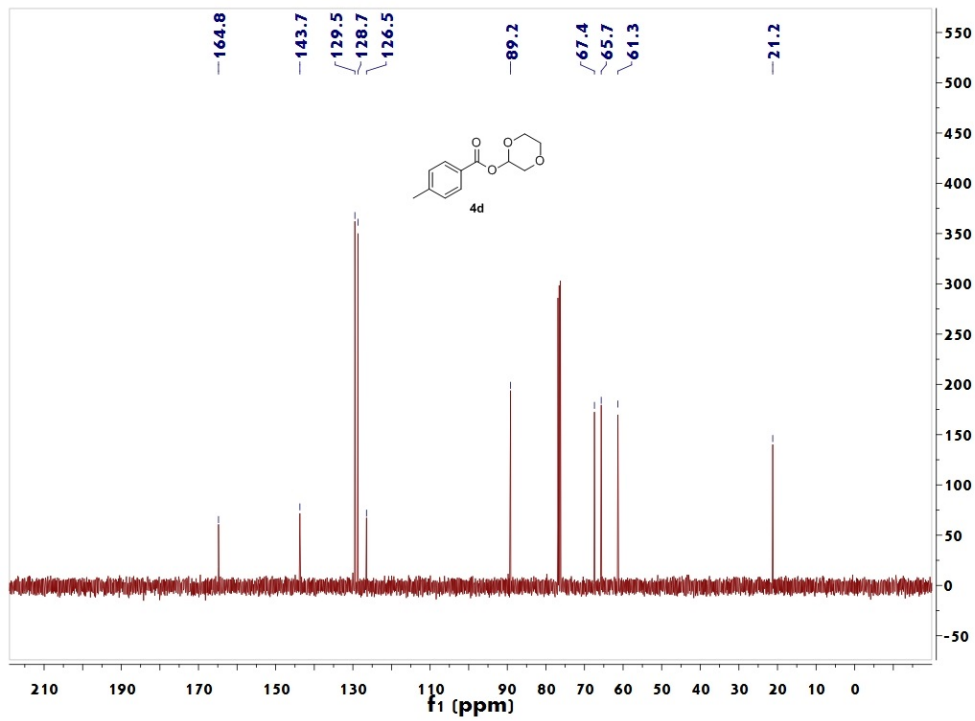

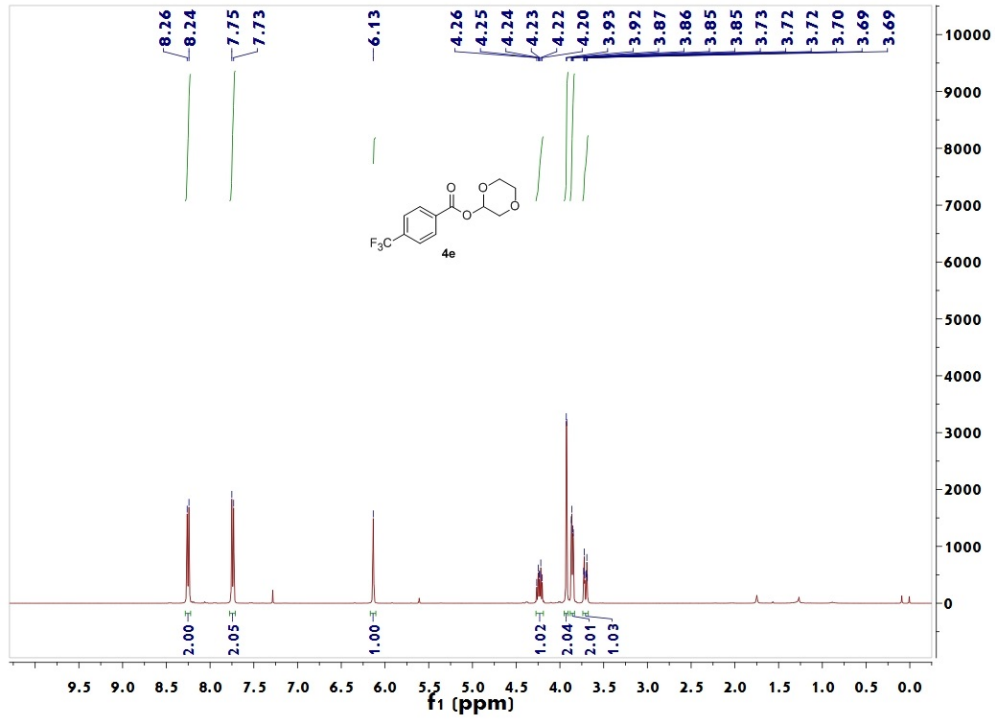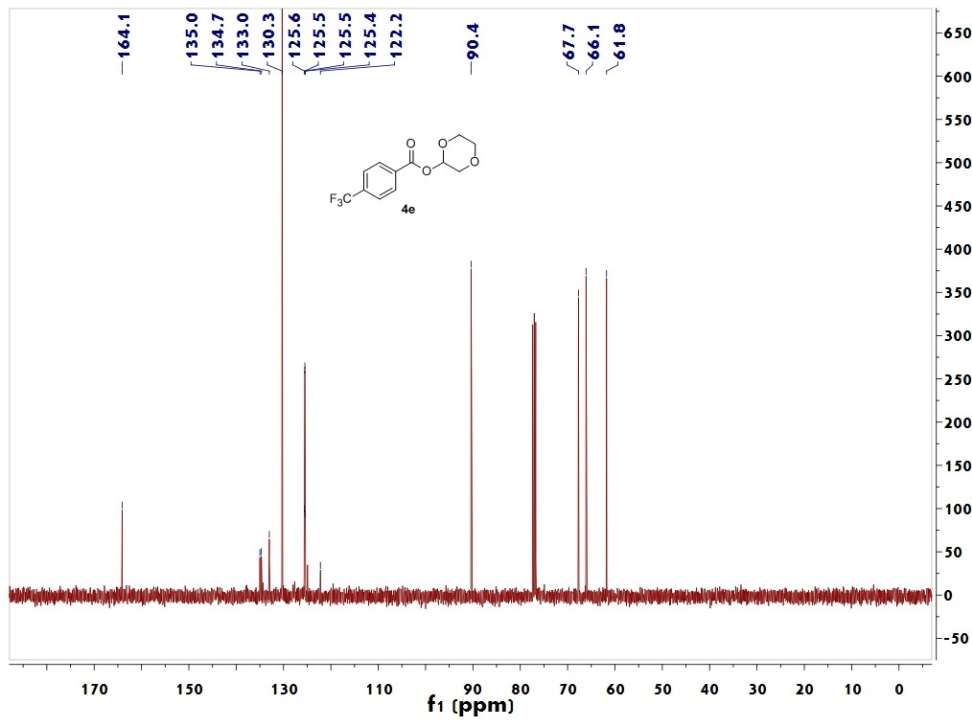

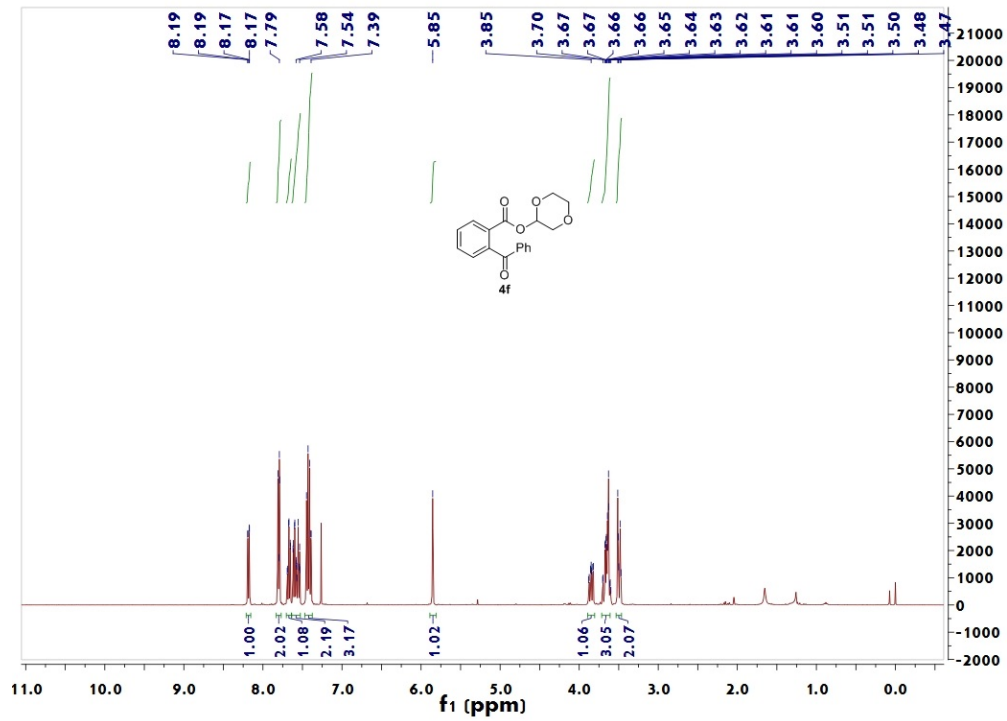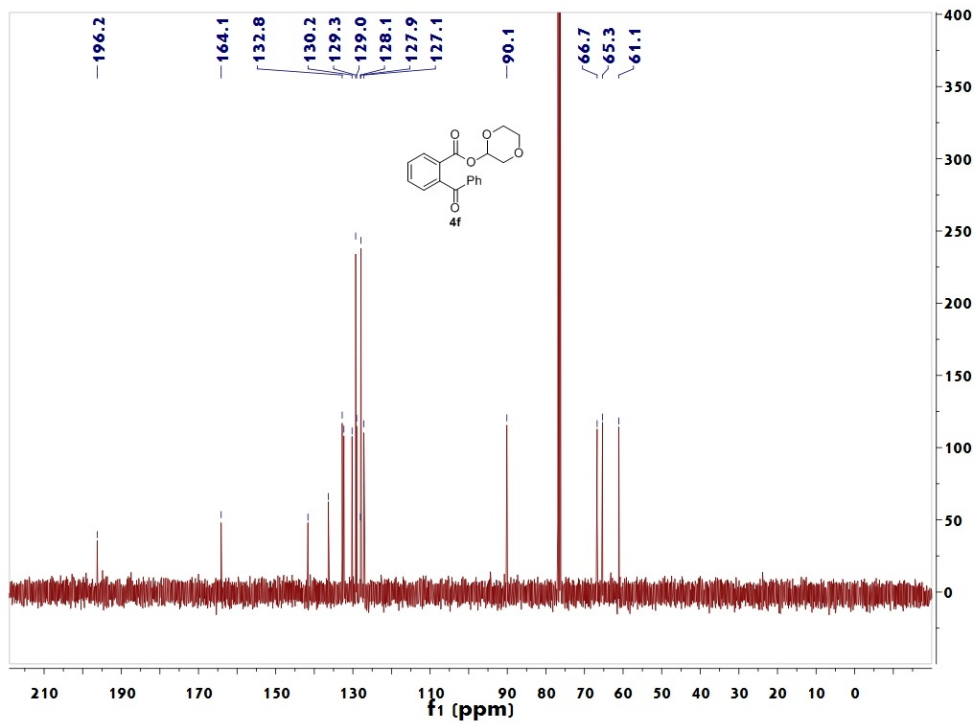



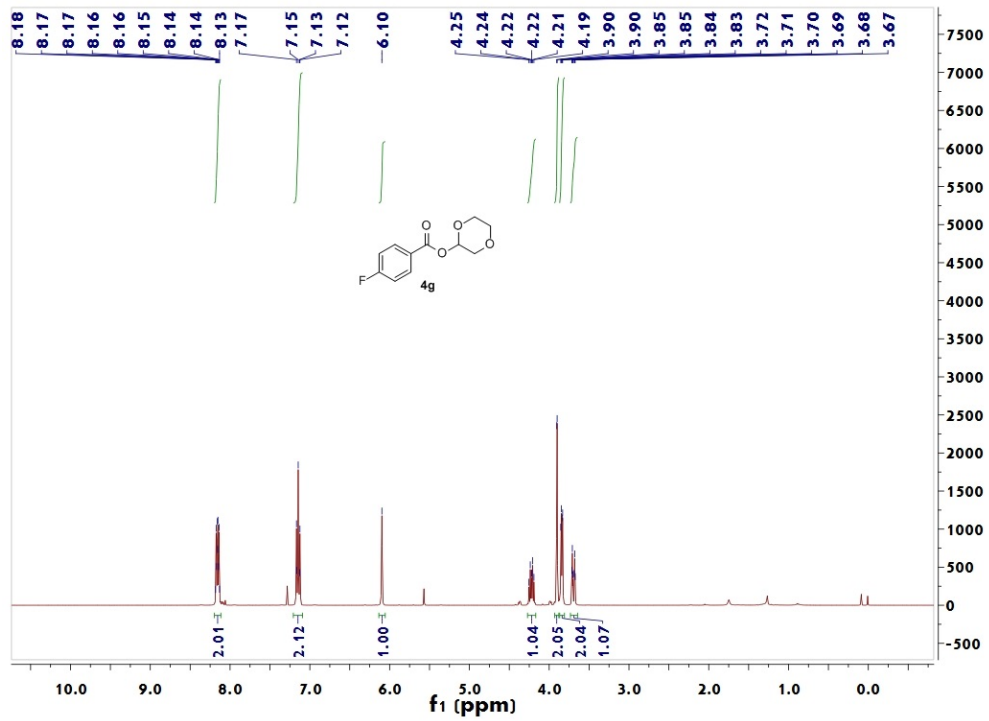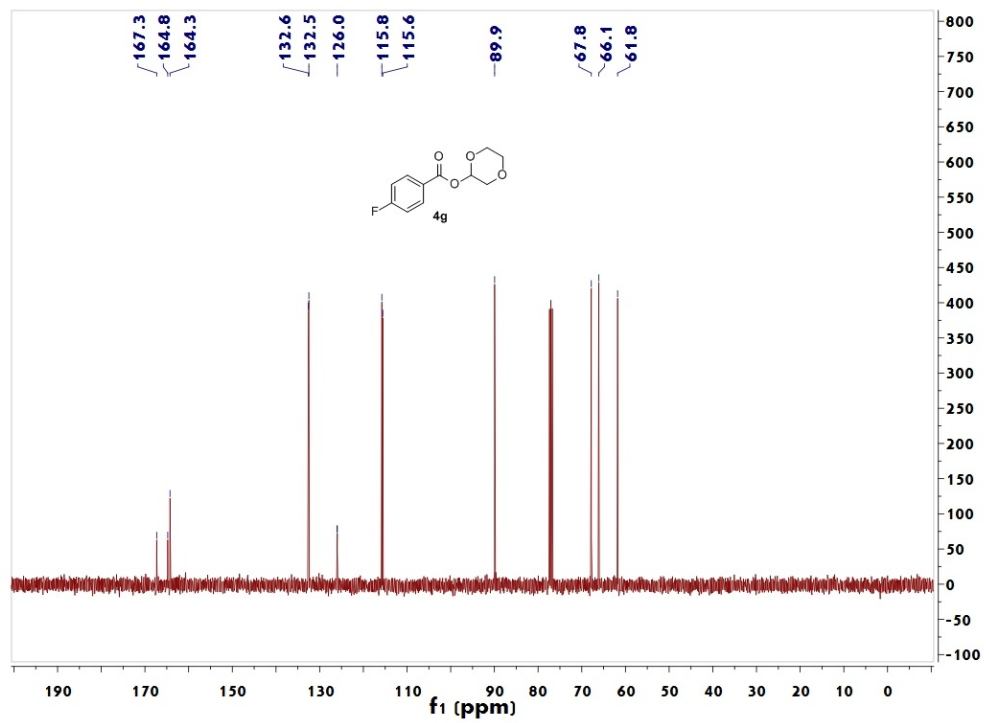

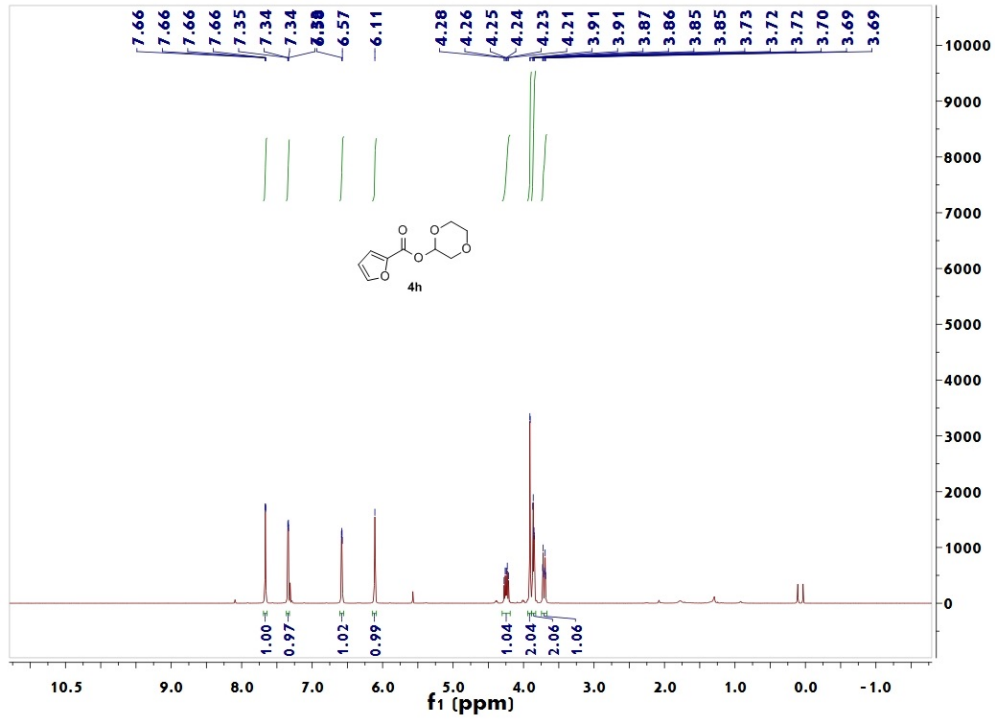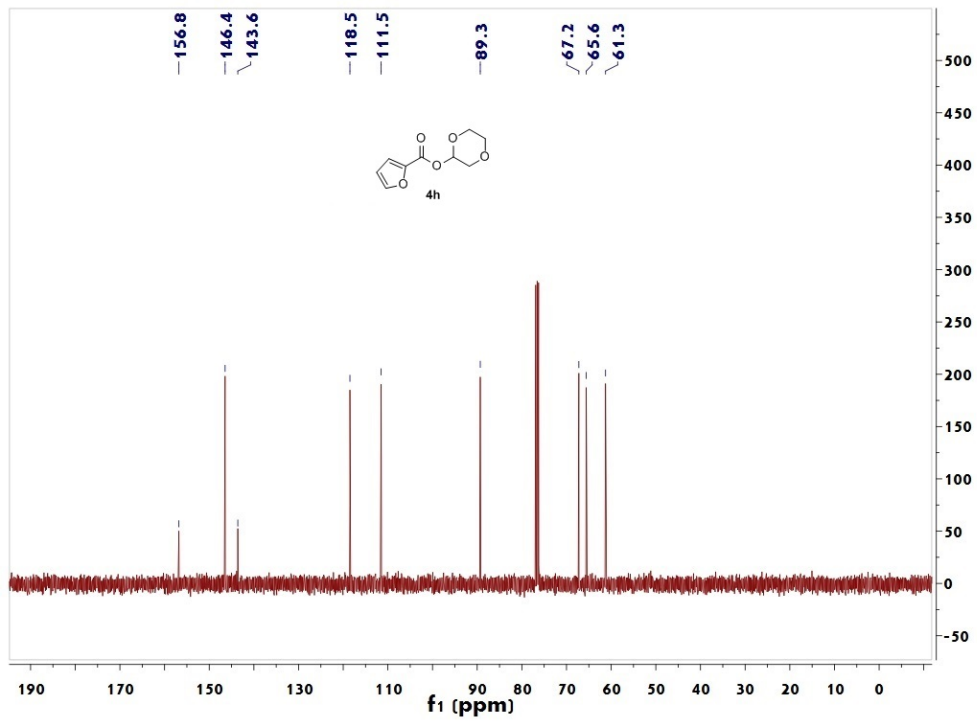

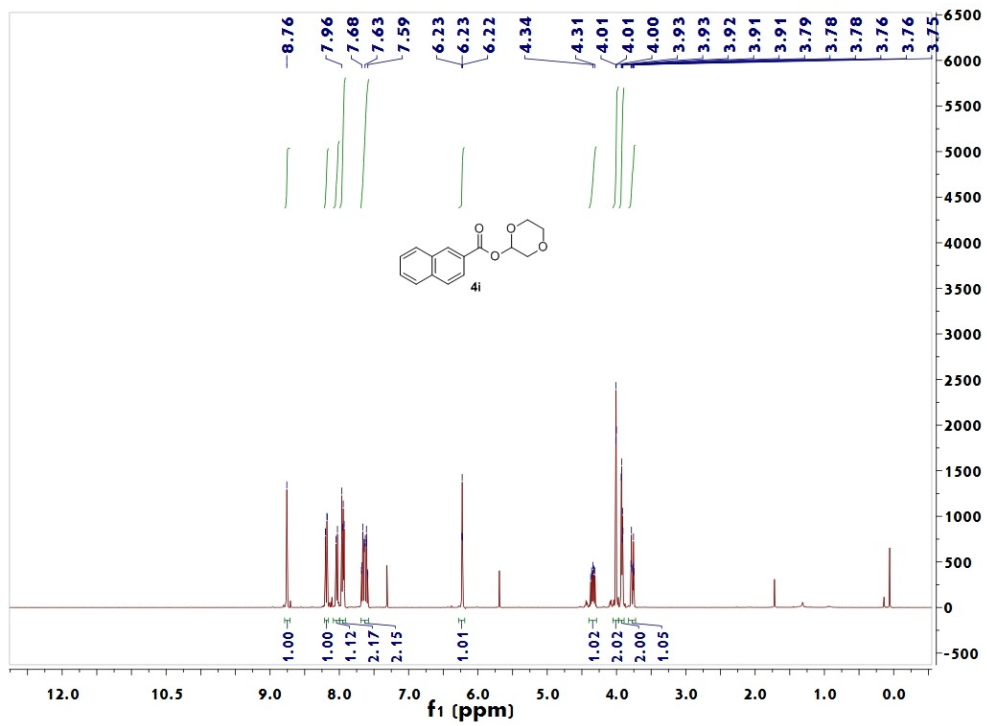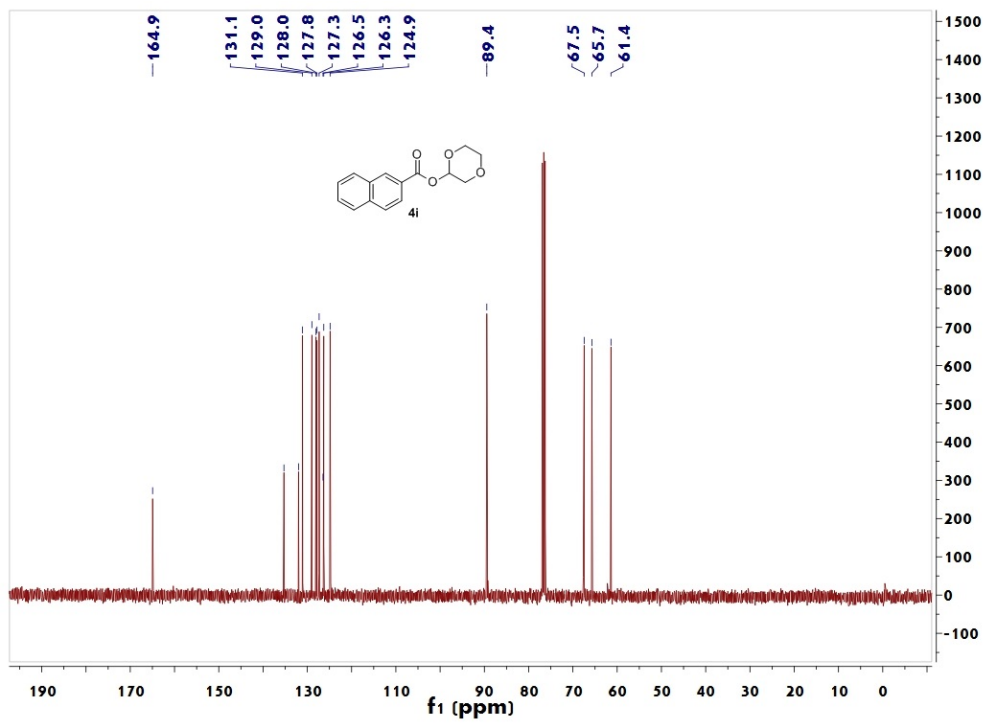

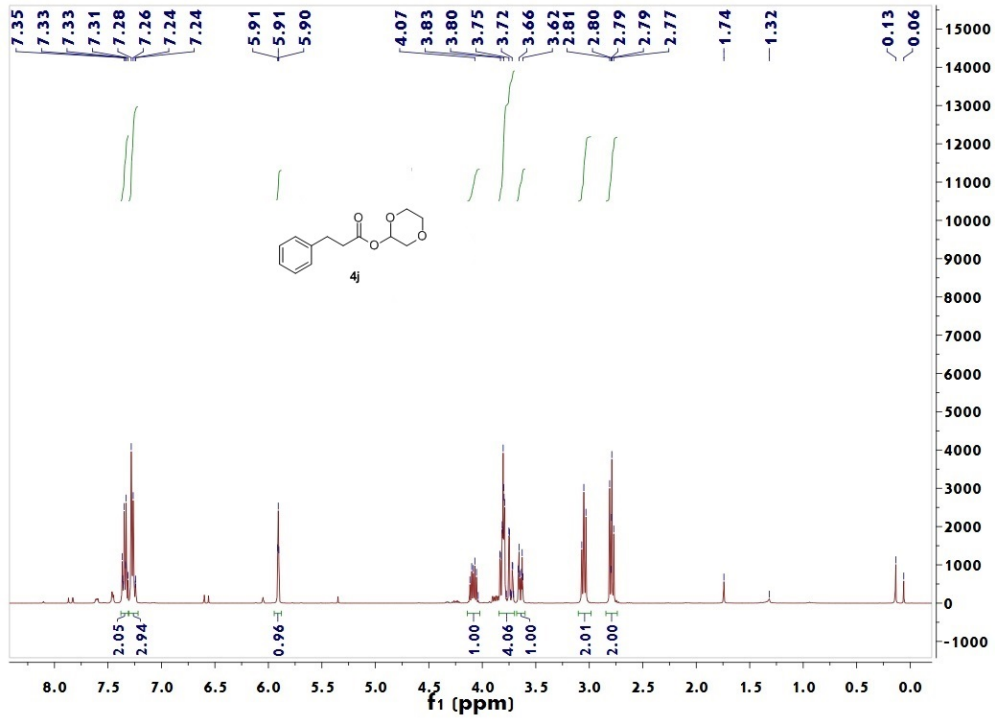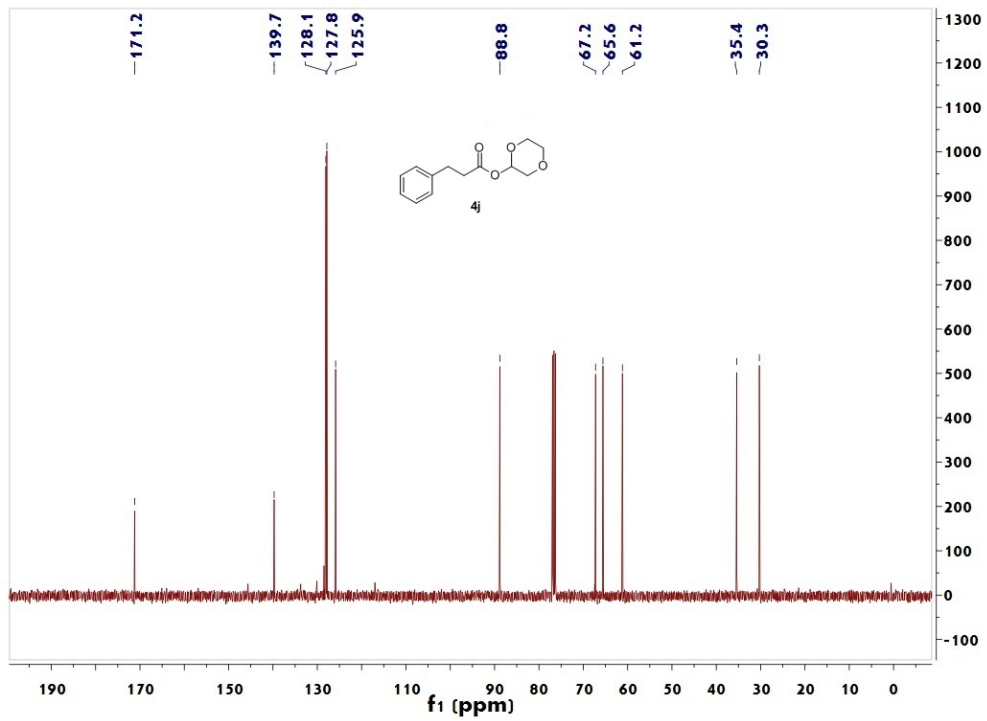

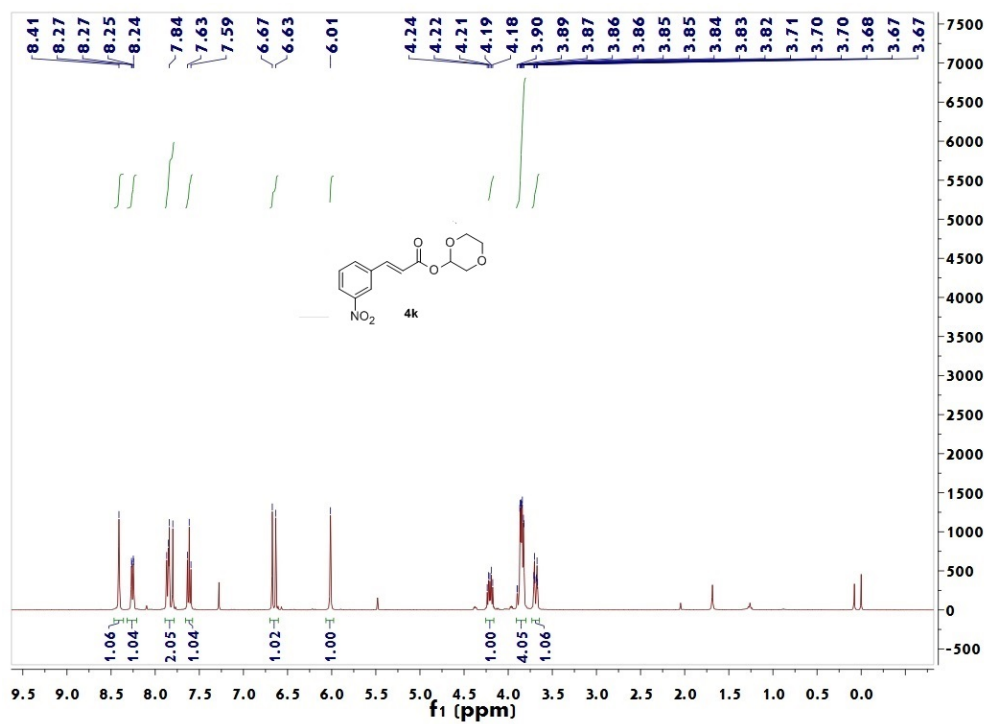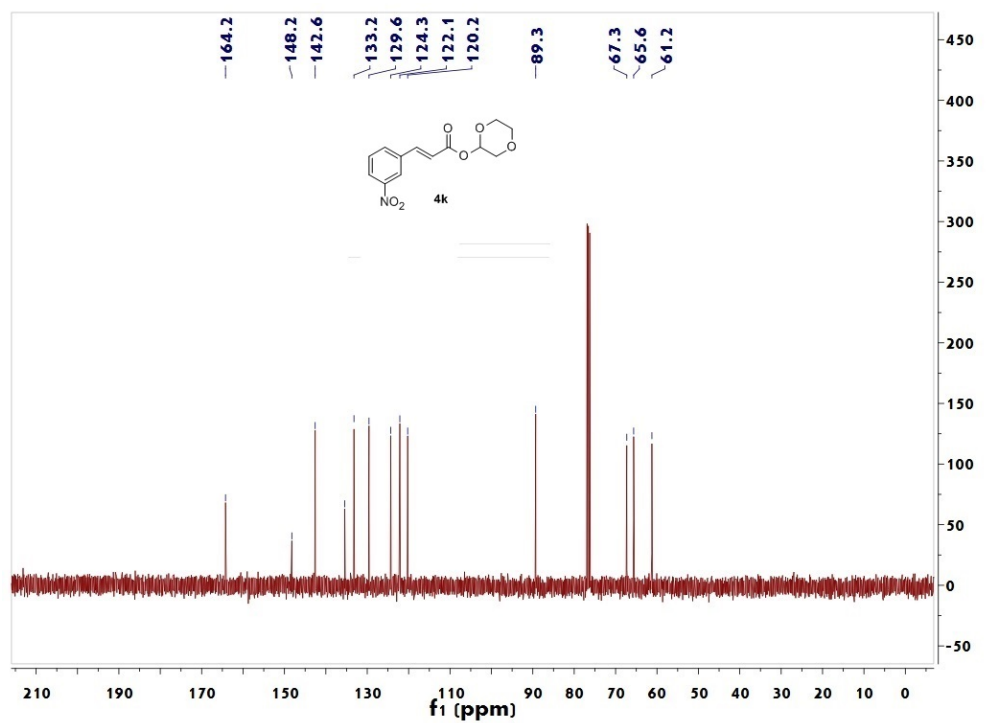

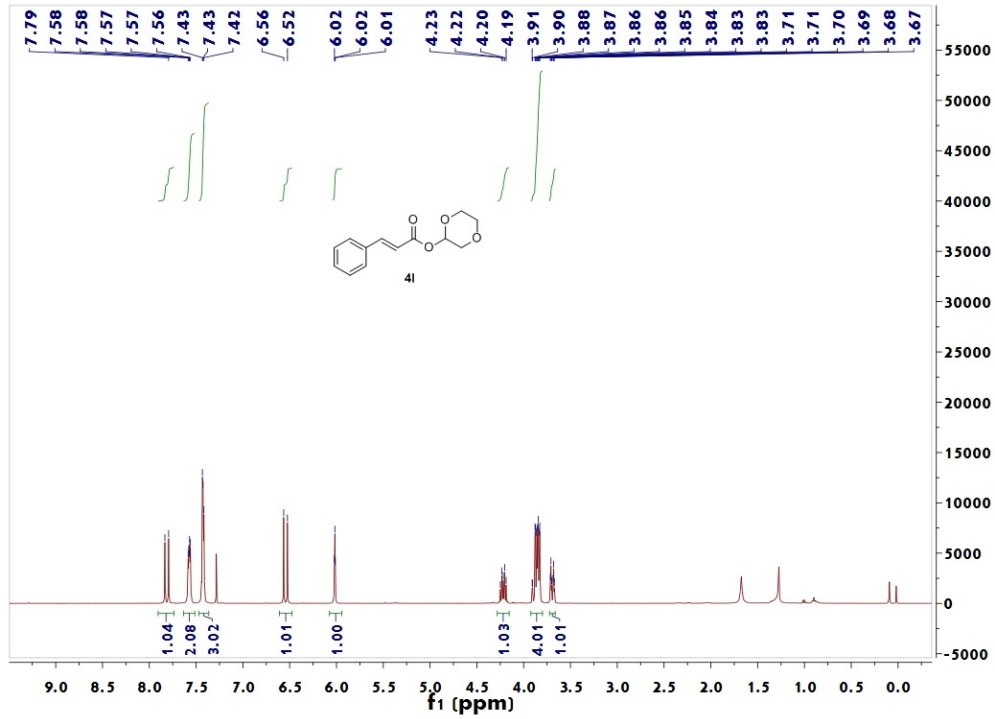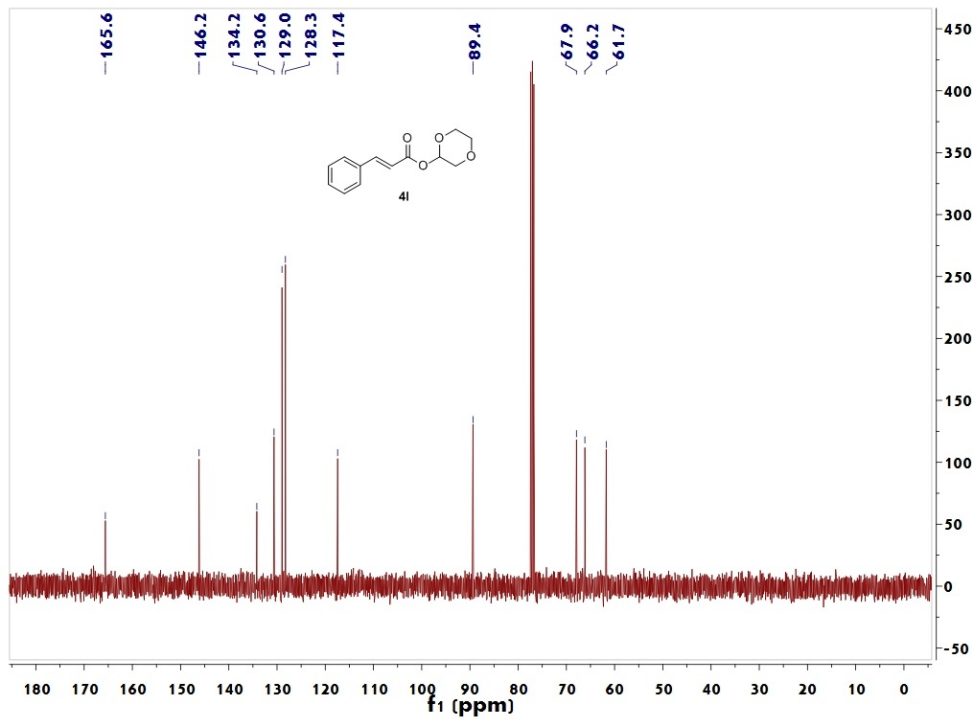

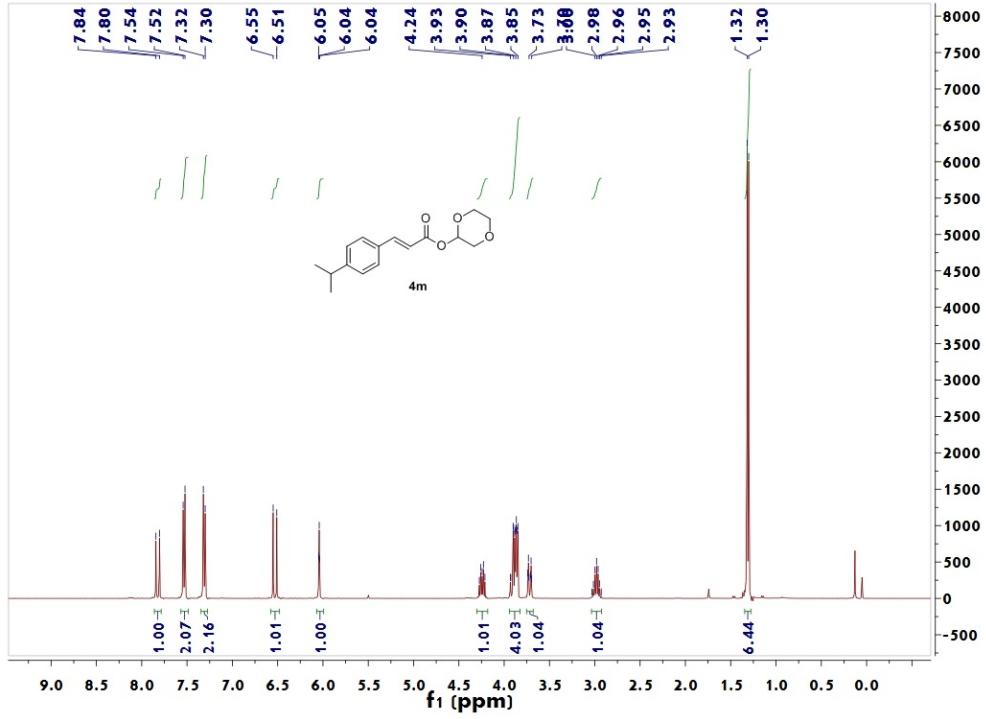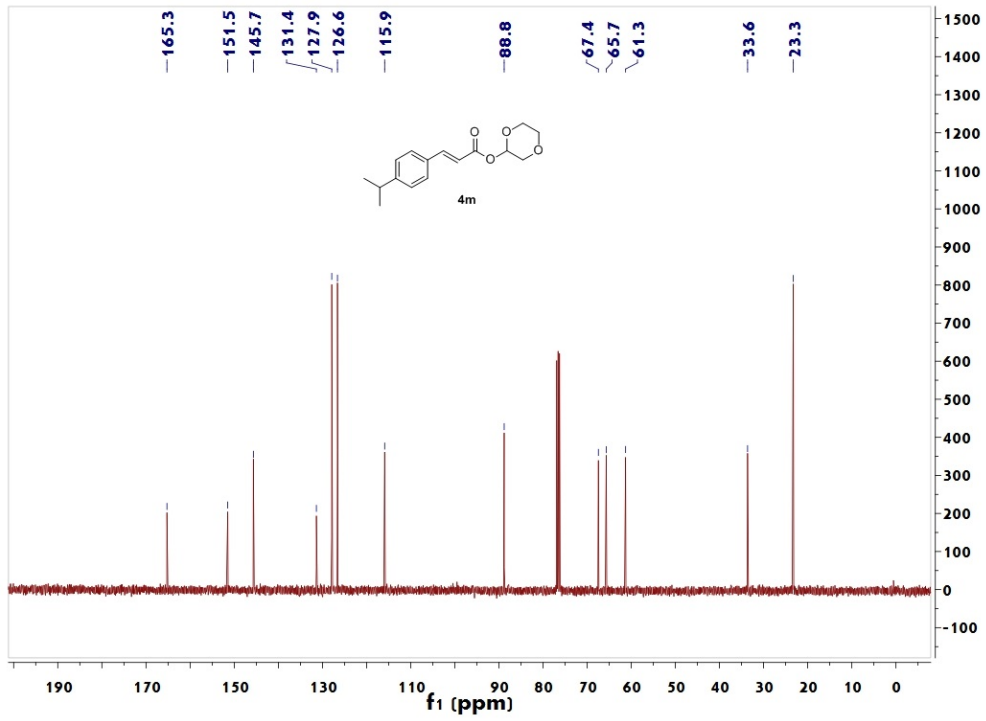

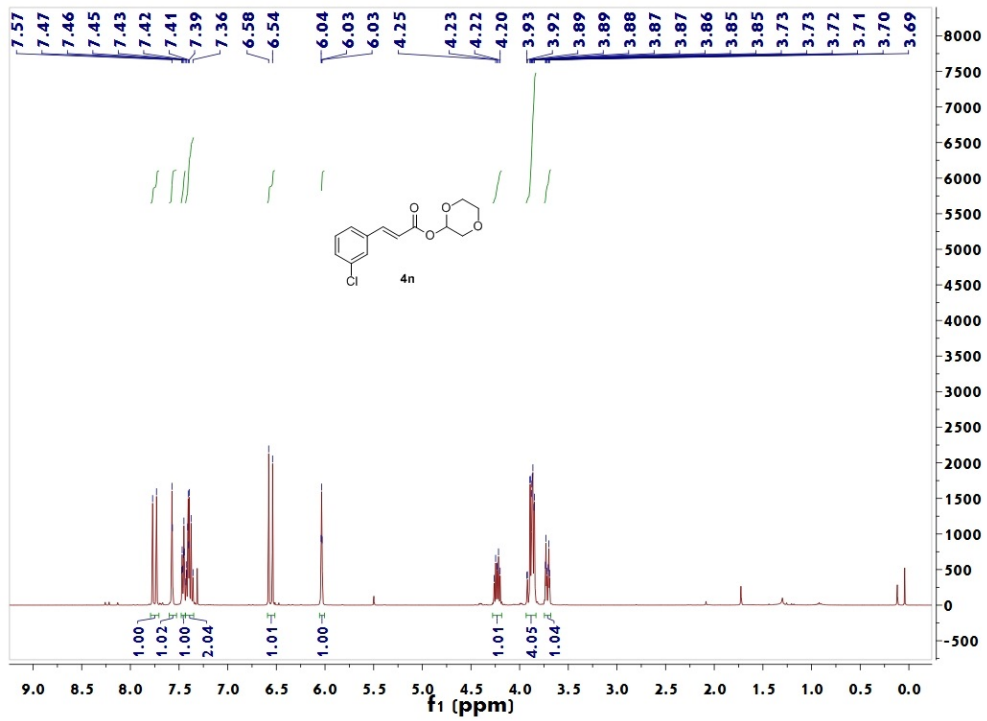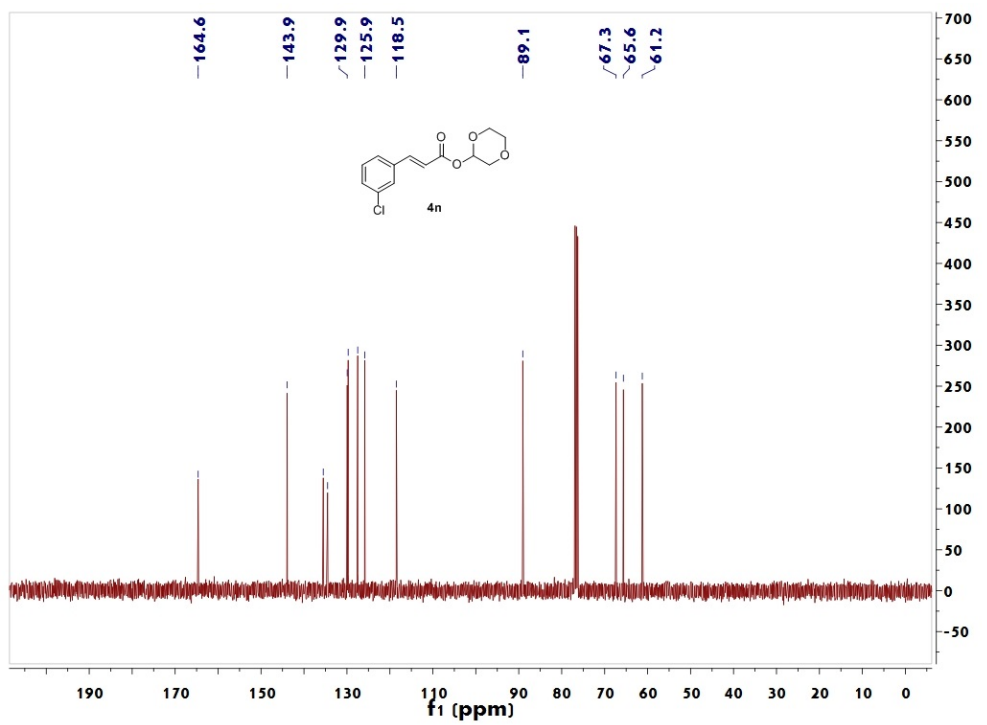



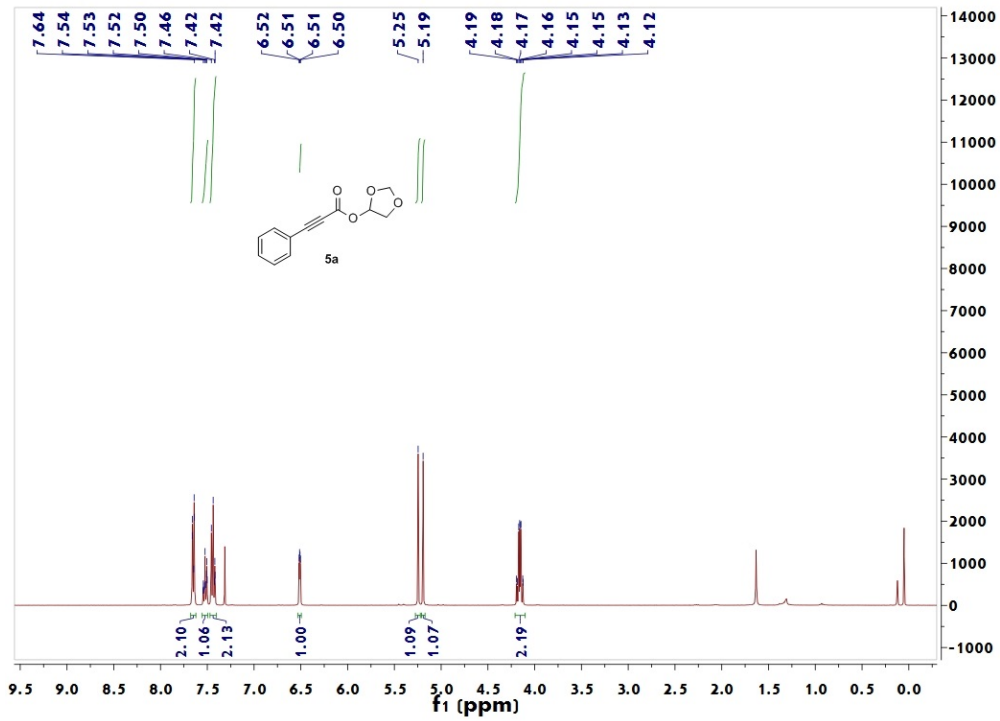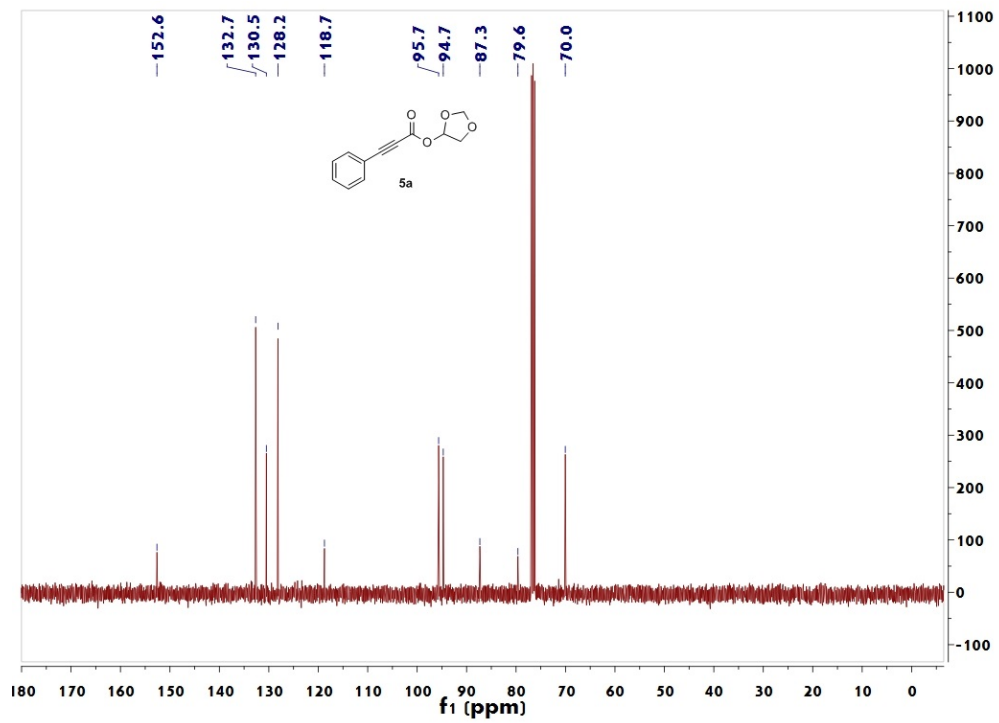

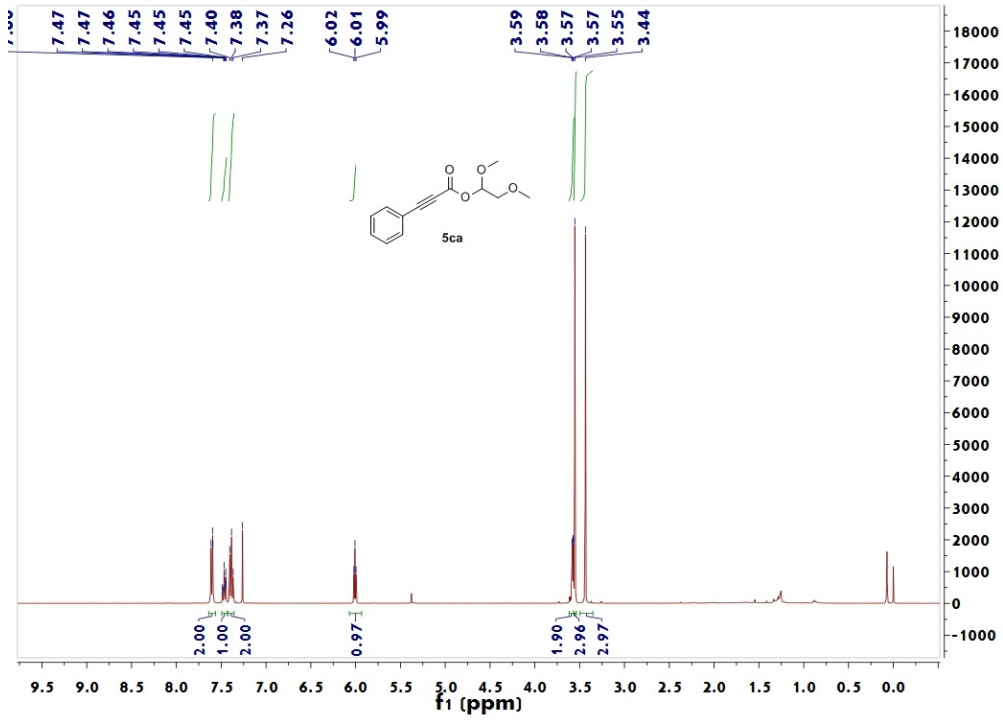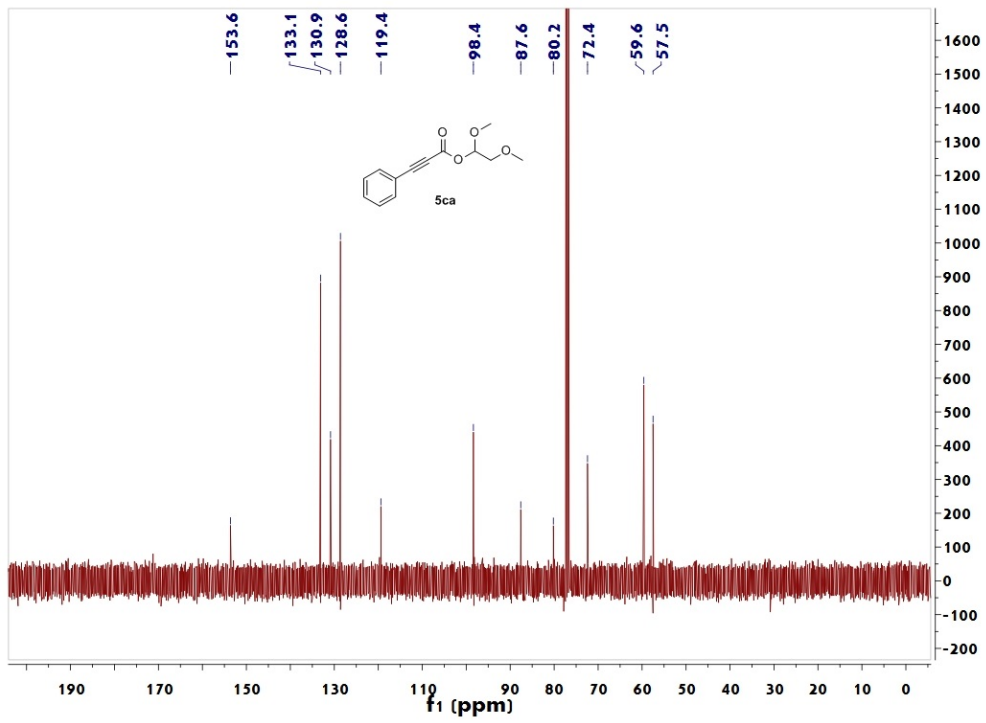

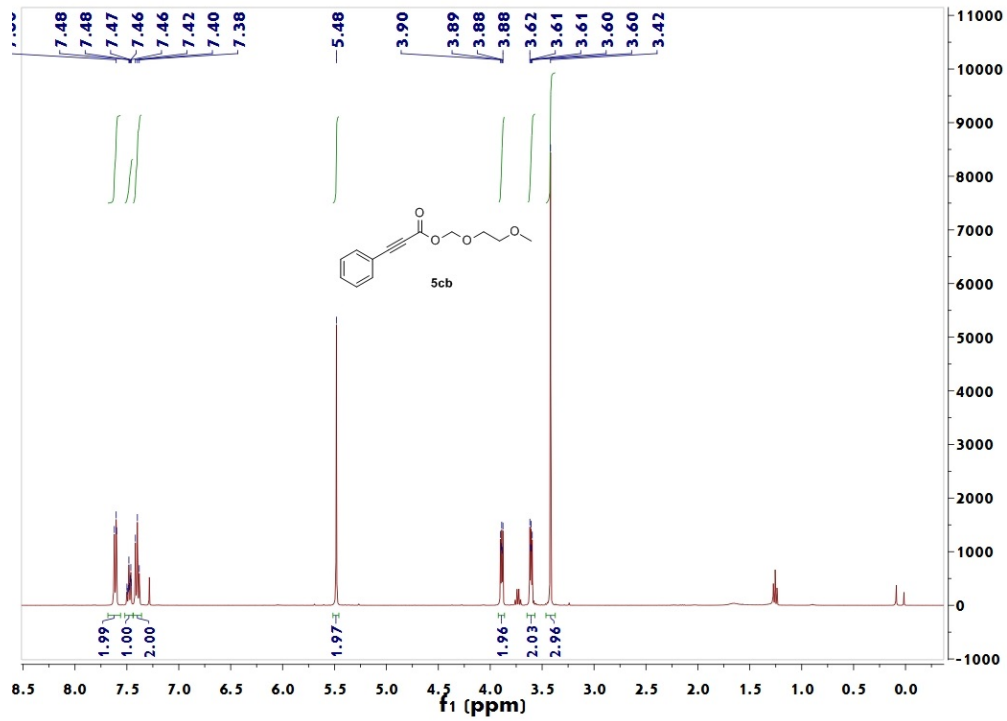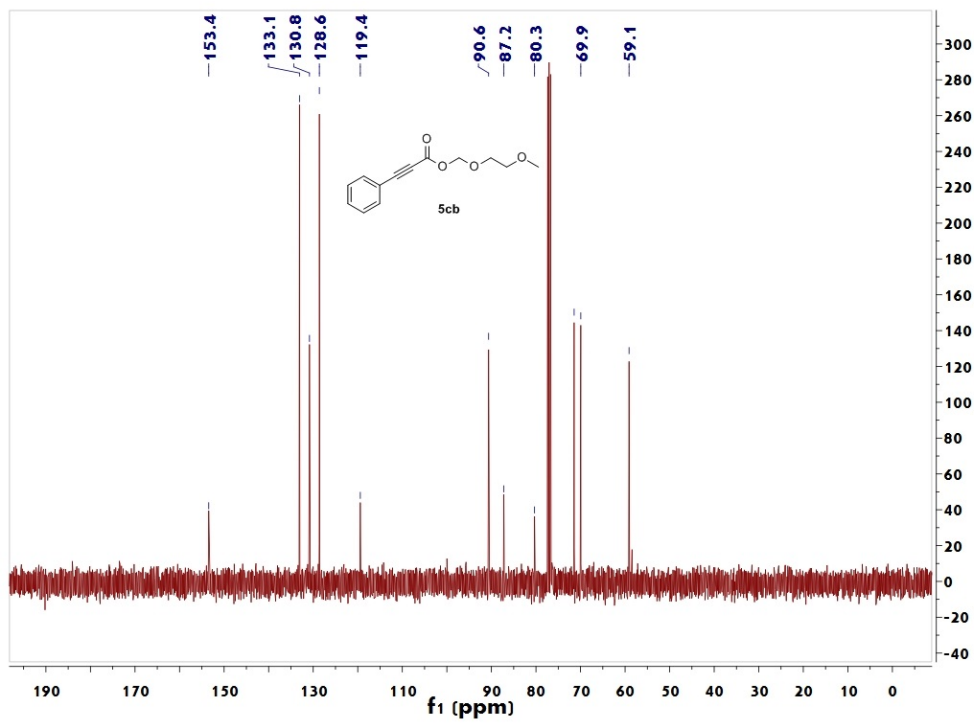

## Copy of HR-MS Spectra:

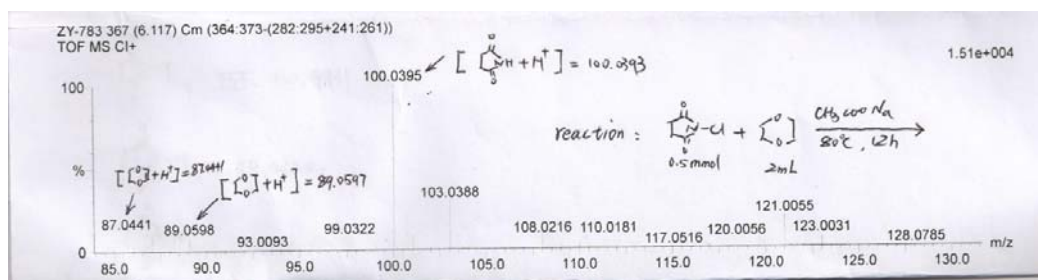

## Proton NMR Observation of Intermediates A and D:

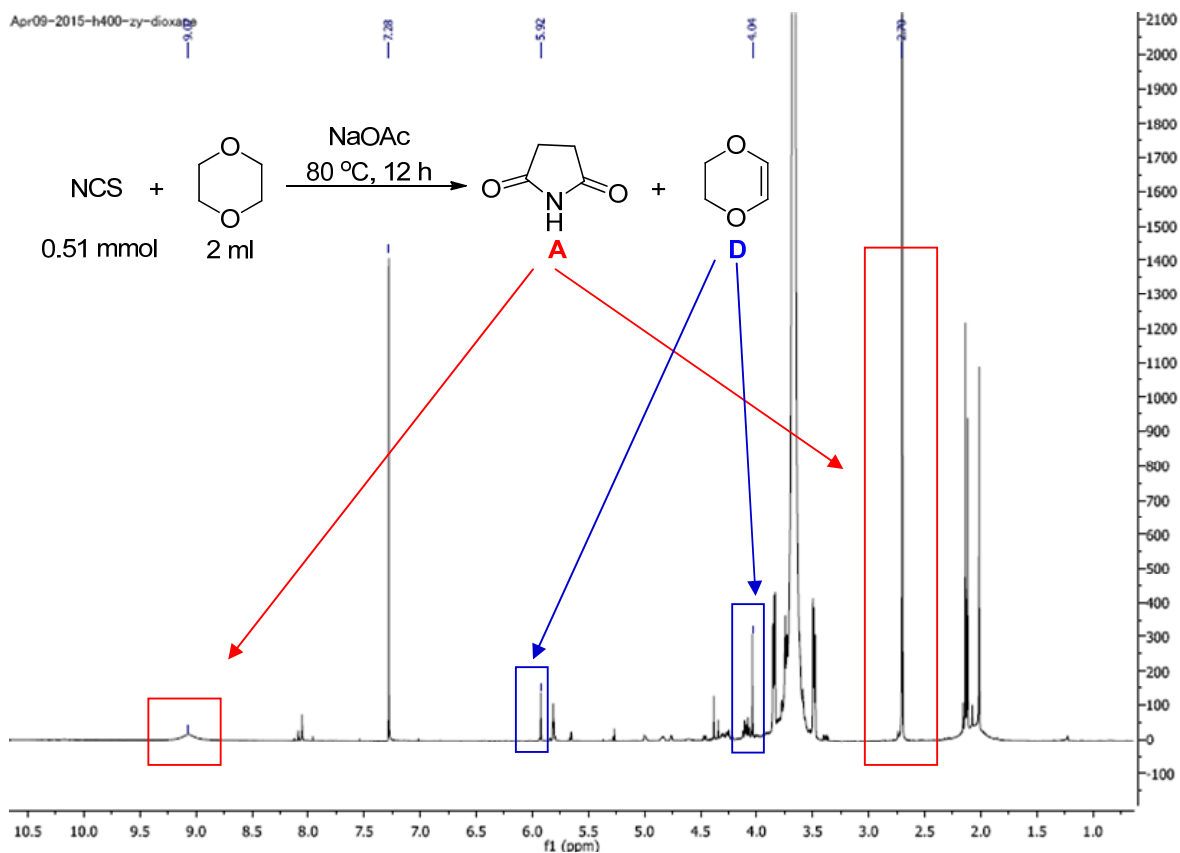

Supplement: c5cc02424b1.pdf [file c5cc02424b1.pdf]
